1 **Endogenous bystander killing mechanisms enhance the activity of**  
2 **novel FAP-CAR-T cells against glioblastoma**

3 Wenbo Yu<sup>1,2\*</sup>, Lisa M. Ebert<sup>1,2,3\*</sup>, Nga Truong<sup>1,2</sup>, Ruhi Polara<sup>1</sup>, Kevin K. He<sup>1,4</sup>, Tessa Gargett<sup>1,2,</sup>  
4 <sup>3</sup>, Erica Yeo<sup>1,2</sup>, and Michael P. Brown<sup>1,2,3</sup>

5 <sup>1</sup> Centre for Cancer Biology, SA Pathology and University of South Australia, Australia

6 <sup>2</sup> Cancer Clinical Trials Unit, Royal Adelaide Hospital, Adelaide, SA, Australia

7 <sup>3</sup> School of Medicine, The University of Adelaide, Adelaide, SA, Australia

8 <sup>4</sup> UniSA Clinical and Health Sciences, University of South Australia, Adelaide, SA, Australia

9

10 \* The first two authors contributed equally to this study.

11 **Running Title: Bystander killing enhances FAP-CAR-T cells targeting GBM**

12 **Key words:** CAR-T, glioblastoma, bystander killing, Fibroblast activation protein, glioma  
13 neural stem cells.

14

15 **Additional information:**

16 This work was supported by a Beat Cancer Project Hospital Support Package (MPB), the  
17 Neurosurgical Research Foundation (LE, MPB, TG), Tour de Cure (LE, MPB), the Ray & Shirl  
18 Norman Cancer Research Trust (LE, MPB), and the Health Services Charitable Gifts Board  
19 Adelaide.

20

21 Corresponding Author: Lisa Ebert, email [lisa.ebert@sa.gov.au](mailto:lisa.ebert@sa.gov.au)

22 Conflicts of Interest: The authors declare no conflict of interest.

23

24 Word count:

25 Total number of figures: 6

26 Total number of tables: 1

## 27 **Abstract**

28 CAR-T cell therapies are being intensely investigated as a novel immunotherapy approach for  
29 glioblastoma (GBM), but so far clinical success has been limited. We recently described FAP as  
30 an ideal target antigen for GBM immunotherapy, with expression on tumor cells and tumor  
31 blood vessels occurring frequently in patients' tumors but with very limited expression in  
32 healthy tissues. Here, we generated a novel FAP-targeting CAR with CD3 $\zeta$  and CD28 signaling  
33 domains and tested the resulting CAR-T cells for their ability to lyse GBM cells in vitro and in  
34 vivo. FAP-CAR-T cells showed target specificity against model cell lines and exhibited potent  
35 cytotoxicity against patient-derived glioma neural stem (GNS) cells. Remarkably, complete  
36 destruction of tumor cells was observed even where the antigen was expressed by a minor  
37 subpopulation of cells, indicating a bystander killing mechanism. Using co-culture assays, we  
38 confirmed the ability of FAP-CAR-T cells to mediate bystander killing of antigen-negative  
39 tumor cells, but only after activation by antigen-expressing target cells. This bystander killing  
40 effect was at least partially mediated by soluble factors. We also observed that the non-  
41 transduced fraction of the CAR-T cell product could be activated via T cell-secreted IL-2 to  
42 mediate antigen-non-specific killing, further amplifying the bystander effect. FAP-CAR-T cells  
43 controlled without overt toxicity the growth of subcutaneous tumors created using a mixture  
44 of antigen-negative and antigen-positive GBM cells. Together, our findings advance FAP as a  
45 leading candidate for clinical CAR-T cell therapy of GBM and highlight under-recognized  
46 antigen non-specific mechanisms that may contribute meaningfully to the antitumor activity  
47 of CAR-T cells.

## 48 **Introduction**

49 Glioblastoma multiforme (GBM) is the most lethal form of primary brain tumor and there is an  
50 urgent need for more effective therapies. Despite receiving intensive treatment upon initial  
51 diagnosis with all three classical pillars of cancer therapy (surgery, radiotherapy, and  
52 chemotherapy), patients almost inevitably relapse within a matter of months. There is no  
53 standard treatment for recurrent GBM, and most patients will die within 6 months of  
54 recurrence(1). The recent emergence of a ‘fourth pillar’ of cancer treatment, immunotherapy,  
55 may provide new hope that this dismal picture can be changed.

56 Chimeric antigen receptor (CAR)-T cells are one of the success stories of cancer  
57 immunotherapy, but so far clinical impacts are limited to B-cell malignancies. There remain  
58 significant hurdles to overcome before this success can be extended to solid tumors(2). One  
59 clear challenge is the lack of ideal target antigens in solid tumors, in contrast to B-cell  
60 malignancies where lineage markers, such as CD19, show near-ubiquitous expression on  
61 cancerous cells and no expression outside the hematologic compartment. Nevertheless, the  
62 possibility of adapting CAR-T cell therapy to the treatment of GBM is under extensive  
63 investigation(3). Most interest to date for clinical CAR-T targeting of GBM has focused on  
64 targeting the antigens EGFRvIII, HER2 and IL-13R2 $\alpha$ (4-9). And although encouraging studies  
65 are in progress, positive outcomes from clinical trials to date have been modest, with only a  
66 single patient reported to undergo complete albeit non-durable tumor regression in response  
67 to a CAR-T cell treatment(6). Given the profound tumor heterogeneity of GBM, identification  
68 of more and better targets is a key focus of research.

69 Fibroblast activation protein (FAP) is a surface-expressed proteolytic enzyme that is well  
70 known for its expression in cancer-associated fibroblasts(10). Because of this, FAP has been  
71 identified as a promising immunotherapy target for carcinomas which are typically heavily  
72 infiltrated with fibroblasts, such as those of prostate, breast, lung, and pancreas. In those  
73 studies, FAP has primarily been investigated as the target of tumor supporting stroma(11-14),  
74 but can also serve as a direct tumor target in certain cancers such as mesothelioma(15,16).  
75 We and others found FAP to be consistently over-expressed in GBM compared to normal  
76 brain, although we failed to find fibroblast expression of FAP in GBM(17,18). Rather, our  
77 detailed expression analyses of all cell types in GBM revealed heterogeneous expression of  
78 FAP on the tumor cells, coupled with near-ubiquitous expression around tumor blood vessels,  
79 with expression observed on both endothelial cells and pericytes. These studies suggest FAP is  
80 an ideal immunotherapy target for GBM, as it should allow targeting of not only tumor cells,  
81 but also the tumor's supporting vascular networks(17).

82 FAP-specific CARs have been described in the literature. All FAP-CARs have been derived from  
83 one of four mouse monoclonal antibodies (mAbs). A CAR developed from the FAP-5 mAb  
84 cross-reacts with both mouse and human FAP. However, FAP-5-CAR-T cells showed serious  
85 toxicities in mice and this CAR has not been pursued further(19). A second CAR developed  
86 from the F19 mAb recognizes only human FAP, thus this CAR could not be used to test  
87 potential host FAP-related toxicities in mouse models (15,16,20). A third CAR developed from  
88 mAb 73.3 cross-reacts with both mouse and human FAP and showed limited toxicities in  
89 mice(13,14). CAR-T cells derived from both F19 and 73.3 mAbs showed antitumor effects in  
90 mouse models of multiple types of transplanted tumors(13,16) and have now progressed into  
91 phase 1 clinical trials (ClinicalTrials.gov Identifiers: NCT039325652019 and

92 NCT017221492015). However, neither CAR-T has been tested on GBM. F19-CAR-T cells were  
93 well tolerated clinically(21), although no detailed report of either trial has been released yet.

94 In this study, we generated a FAP-specific CAR derived from the MO36 mAb, which was  
95 selected from phage display and recognizes both murine and human FAP(22). Another CAR  
96 based on MO36 previously showed antitumor effects in a lung cancer mouse model without  
97 toxicity(12). We tested FAP-CAR-T cell function using model cell lines, tumor cells expanded  
98 from patient GBM tissues, and a mouse model designed to recapitulate the natural  
99 heterogeneity of GBM. In addition to confirming the specificity and activity of FAP-CAR-T cells,  
100 we also uncovered a potent bystander killing mechanism that could facilitate more complete  
101 tumor destruction than would be predicted by antigen expression alone.

102

103

## 104 **Materials and methods**

### 105 ***Tumor cell lines***

106 All cell lines and GNS cells used in this study are listed in Table S1. U251, U87 and RPMI-7951  
107 cell lines were obtained from ATCC. U251-GFP and U87-RFP were a kind gift from Professor  
108 Stuart Pitson (Centre for Cancer Biology, Adelaide). All cells were maintained in Minimum  
109 Essential Medium Eagle supplemented with 10% fetal bovine serum (FBS), 1%  
110 penicillin/streptomycin, 1% glutamax, 1% sodium pyruvate, and 1% MEM non-essential amino  
111 acid solution (all ThermoFisher Scientific). Short-term cultured GNS cell lines were a kind gift  
112 from Professor Bryan Day (QIMR Berghofer Medical Research Institute, Brisbane) or were  
113 generated in our laboratory as described(17,23). GNS cell lines were cultured in StemPro  
114 Neural Stem Cell medium (StemPro NSC, ThermoFisher Scientific) in flasks, which were pre-  
115 coated with Matrigel (Corning) diluted 1/100 in PBS according to the manufacturer's  
116 recommendations. Cultures were passaged using Accutase (ThermoFisher) when they reached  
117 ~70-90% confluence.

### 118 ***CAR transgene design and construction***

119 Anti FAP scfv with Myc tag was obtained by PCR using donated plasmid containing MO36 as a  
120 template. The primers were F: GCCCGACGTCGCCACCatggactggatctggcgcac ; R:  
121 TGCGGCCCCATTGATCCTCTTCTGAGATGAGTTTTTGTCTGCGGCCGCCGTTTTATTCCAGC. A  
122 human IgG4 hinge/CH2CH3 was chosen as a long spacer to reduce the affinity to human  
123 FcRs(24,25). Aiming to avoid activation-induced cell death by further reducing its affinity to  
124 human and murine FcRs, additional modifications were made to the CH2 region. Three amino  
125 acid (PVA) derived from IgG2 substituted for four amino acids (EFLG) in the corresponding

126 region of IgG4, and another glycosylation motif was mutated from N to Q(26,27). The CD3ζ  
127 and CD28 signaling domains were positioned after the spacer. Hinge, spacer and signaling  
128 domains were synthesized by GeneArt. All fragments were assembled on pEntry vector and  
129 subcloned into lenti vector pPHLV-A.

### 130 ***Generation of CAR-T cells***

131 HEK293T cells in a T175 flask were transfected with 46.4μg DNA consisting of equal amounts  
132 of four plasmids using 138μL lipofectamine 2000 (ThermoFisher). The plasmids were: (i)  
133 pHLVA-FAP-CAR, which provides the lentiviral RNA containing the CAR; (ii) pMD2.G, which  
134 provides expression of VSV-G; (iii) pMDLgpRRE, which provides expression of gag pol; and (iv)  
135 pRSV-REV which provides the rev gene for lentiviral packaging. The supernatant was  
136 harvested 48h after transfection, centrifuged at 500 x g for 10min. and filtered through a  
137 0.45μm filter (Nalgene™ Rapid-Flow™), ready for transduction. To produce CAR-T cells, a 24-  
138 well plate was pre-coated with anti-CD3 (OKT3) and anti-CD28 antibodies (15E8) (Miltenyi  
139 Biotec) at 1μg/mL on day 0. PBMC were seeded at  $1 \times 10^6$  cells/well on day 1 in Advanced  
140 RPMI (ThermoFisher) with 10% FBS, with IL-7 and IL-15 (Miltenyi Biotec) added at 10ng/mL  
141 and 5ng/mL, respectively, on day 2. On day 3, the activated T cells were transduced by  
142 spinoculation with lentivirus encoding FAP-CAR. In brief, 0.5mL T cells at  $2 \times 10^6$  cells/mL were  
143 mixed with 1.5mL lentiviral supernatant and centrifuged in 24-well plates pre-coated with  
144 7μg/mL Retronectin (Takarabio) at 1000 x g for 20min. The transduced T cells were expanded  
145 for another 4 days with IL-7/IL-15 before being cryopreserved in FBS + 10% DMSO and stored  
146 in liquid nitrogen. Before use, the CAR-T cells were thawed and rested overnight in Advanced  
147 RPMI with 10% FBS. CAR expression was detected by FITC-conjugated anti-myc tag antibody

148 (Abcam) and analyzed by flow cytometry using an Accuri C6 Plus flow cytometer (BD  
149 Bioscience, Franklin Lakes, NJ, USA).

#### 150 ***IL-2 assay***

151 Target cells were seeded in a flat-bottom 96-well plate at 20,000 cells/well on day 0. On day 1,  
152 the plate was topped up with  $1 \times 10^5$  CAR-T cells per well. The supernatant was collected on  
153 day 3 and analyzed by human IL-2 ELISA Kit (ThermoFisher) according to the manufacturer's  
154 protocol.

#### 155 ***Flow cytometry analysis of FAP expression***

156 U251, U87 and RPMI-7951 cells were stained by PE-conjugated anti-FAP antibody (clone  
157 427819, R&D Systems) in 5% BSA/PBS staining buffer for 30min. Cells were washed with  
158 staining buffer and  $1 \mu\text{L}$  7AAD (ThermoFisher) was added in a final resuspension volume of  
159  $200 \mu\text{L}$  before analysis by flow cytometry (BD Accuri™). For staining of GNS cultures, cells were  
160 harvested using Accutase (ThermoFisher), washed in PBS and resuspended in FACS buffer (PBS  
161 + 1% bovine serum albumin + 0.04% sodium azide). Cells were then stained as described  
162 above.

#### 163 ***Cytotoxicity assay using real-time impedance-based cell analysis***

164 The Axion BioSystems Maestro Z system was used to measure cytotoxicity. After addition of  
165  $100 \mu\text{L}$  of culture medium to the plate, a baseline reading was taken and then target cells were  
166 seeded in a volume of  $100 \mu\text{L}$  at 15,000 cells/well for U87 and U251 or 10,000 cells/well for  
167 GNS cultures. The wells were pre-coated with Matrigel if GNS cells were used as targets.  
168 Resistance values were monitored every 60sec using AxisZ software during overnight culture



169 at 37°C in the Maestro Z instrument. Once formation of a stable monolayer was confirmed,  
170 100µL of CAR-T cells were added in the same medium as the target cells. Resistance values  
171 were normalized to a time shortly after adding CAR-T cells once readings had re-stabilized.  
172 Cytotoxicity was measured as %lysis based on the impedance ratio of tested cells and  
173 untreated control cells, which was calculated by AxisZ software.

#### 174 ***Cytotoxicity assay by flow cytometry***

175 GNS cells ( $1 \times 10^5$ ) were co-cultured with an equal number of FAP-CAR-T cells or control non-  
176 transduced T cells (NT-T) in equivalent culture conditions in StemPro NSC medium in a 24-well  
177 plate. In co-cultures of pairs of GNS cell lines of differing levels of FAP expression, FAP-  
178 expressing GNS cells were first pre-labeled with CellTrace™ Far Red (CTFR; ThermoFisher) at  
179  $1\mu\text{M}$  for 20min at 37°C, to differentiate the populations, and equal numbers of FAP(+) and  
180 FAP(-) cells were mixed. Cells were harvested after 48h co-culture with T cells and stained in  
181 PBS with Fixable Viability Stain 575V (BD) or Fixable Viability Dye eFluor™ 506 (Invitrogen)  
182 where indicated for 10min at room temperature, before antibody staining. The antibodies  
183 used for staining included: BB515 anti-Fas (clone DX2, BD Biosciences), BV786 anti-CD3 (clone  
184 SK7, BD Biosciences), PE anti-FAP (clone 427819, R&D Systems) and BV480 anti-FasL (clone  
185 NOK-1, BD Biosciences). Samples were acquired on an LSR Fortessa (BD Biosciences) and data  
186 analyzed using FCS Express 7 Cytometry (De Novo software, Pasadena, CA, USA).

#### 187 ***Cytotoxicity assay to assess the role of soluble factors***

188 These experiments were conducted in 24-well Transwell plates (Corning) or Nunc Cell Culture  
189 Inserts (ThermoFisher) with a  $0.4\mu\text{m}$  pore size. FAP-expressing cells were plated in the lower  
190 well at  $1 \times 10^5$  cells/well, and  $1 \times 10^4$  FAP-negative cells were seeded in the upper inserts.

191 When monolayers of target cells had established, FAP-CAR-T cells or non-transduced T cells  
192 were added to the bottom well at a 1:1 E:T ratio. After 48h incubation at 37°C, cells in the  
193 inserts were stained using propidium iodide (PI) (ThermoFisher) at 1µg/mL and Hoechst 33342  
194 (ThermoFisher) at 2µM for 20min at 37°C. Without washing, inserts were imaged using an  
195 IX73 microscope equipped with COOLLED pE-4000 light source and running CellSens software  
196 (Olympus). The cells on each image were counted by QuPath (University of Edinburgh). Cell  
197 viability was calculated as  $[1 - (\text{PI counts}/\text{Hoechst counts})] \times 100\%$ .

#### 198 ***Cytotoxicity assay using fluorescence imaging of U87-RFP and U251-GFP cells***

199 U87-RFP and U251-GFP were seeded with starting numbers of  $5 \times 10^4$  cells/well. FAP-CAR-T  
200 cells were immediately added at a 1:1 E:T ratio. The cocultured cells were imaged by the  
201 Olympus IX73 microscope 24h later using 100ms exposure for RFP and 3ms exposure for GFP.  
202 Three fields of views were taken from each well and duplicate wells were used for one assay.  
203 The images were analyzed by ImageJ for fluorescence counts using threshold values of 68-255  
204 for RFP and 98-255 for GFP. All images were collected and analyzed using the same  
205 parameters for consistency.

#### 206 ***Measurement of secreted cytotoxic factors***

207 Supernatants were collected from the cytotoxicity assays conducted in the Maestro Z  
208 instrument at the end point time and stored at -20°C until use. Levels of soluble factors were  
209 quantified simultaneously using the LEGENDplex Human CD8/NK Panel (BioLegend), according  
210 to the manufacturer's protocol. Samples were analyzed using a BD LSR Fortessa.

211

212 ***Murine subcutaneous tumor xenograft model***

213 Animal experiments were approved by the University of South Australia Animal Ethics  
214 Committee (Ethics number: 45/17). Nonobese diabetic/severe combined  
215 immunodeficiency/IL2Rgamma-null (NSG) mice were purchased at 6 weeks from the Animal  
216 Resource Centre (Perth). To create tumors of mixed cell populations, an admixture of  $1 \times 10^6$   
217 U251-GFP cells and  $2 \times 10^6$  U87-RFP cells were injected subcutaneously in both flanks. Tumors  
218 were allowed to establish for 11 days and then  $1 \times 10^6$  CAR-T cells were administered by tail  
219 vein injection. Mice were monitored daily until tumors became palpable, after which time  
220 tumor growth was measured using an electronic caliper every 2-3 days. The volume of the  
221 tumor was calculated as  $\text{length} \times \text{width}^2 \times 1/2$ . Mice were humanely killed when at least one  
222 tumor volume reached  $1000\text{mm}^3$ . Tumors were harvested at the experimental end point and  
223 prepared for frozen sections. Tumor samples fixed in 10% buffered formalin overnight were  
224 cryoprotected with 10% sucrose to 30% sucrose in PBS sequentially before embedding in OCT  
225 (Sakura) and freezing on dry ice, with subsequent storage at  $-80^\circ\text{C}$ . This protocol was selected  
226 and optimized to allow maximum retention of soluble fluorescent proteins (GFP/RFP) during  
227 tissue processing. Cryosections ( $5\mu\text{M}$ ) were cut using a Leica CM1950 cryostat and mounted  
228 using ProLong Gold with DAPI (ThermoFisher). Slides were imaged using the Olympus IX73  
229 microscope. Tumour tissue was located microscopically by DAPI staining. To minimize bias,  
230 photographs were taken for the GFP or RFP channels and areas of green and red fluorescence,  
231 respectively, were automatically calculated using ImageJ (NIH). Threshold 21-255 was used for  
232 RFP area calculation while threshold 35-255 was used for GFP area calculation. Fluorescence  
233 overlays were created by overlaying black and white images and applying false colors using  
234 ImageJ.

235 ***Statistical analysis***

236 Statistical analyses were performed using GraphPad Prism version 5 and OriginPro 8  
237 (OriginLab). In addition, the TumGrowth web program  
238 (<https://kroemerlab.shinyapps.io/TumGrowth/>) (cite PMID: 30228932) was used for  
239 comparison of tumor growth curves by Type II ANOVA. For Kaplan-Meier Survival analysis, Log  
240 Rank method was used to test the Equality over Groups.

241

## 242 **Results**

### 243 ***Generation and production of CAR T cells targeting FAP***

244 Based on previous studies(12,22), we designed and constructed a FAP-CAR comprising the  
245 MO36 single chain fragment-variable (scFv), a myc epitope tag, a long spacer, and CD28 and  
246 CD3 $\zeta$  signaling domains (Figure 1A). This CAR transgene was integrated in CD3/CD28-activated  
247 human T cells via lentiviral transduction. CAR expression on transduced T cells was assessed  
248 by flow cytometry (Figure 1B). Transduction efficiency values sufficient to test CAR-T cell  
249 function (~15-25%) were achieved using unconcentrated viral supernatant.

250 CAR-T cell responses to FAP stimulation in vitro were initially measured by co-culturing CAR-T  
251 cells with FAP-expressing long-term cancer cell lines. The RPMI-7951 melanoma cell line,  
252 which expresses uniformly high levels of FAP, was used as a FAP-CAR-T (FAP-T) cell quality  
253 control. RPMI-7951 cells were co-cultured with FAP-T cells for 48 hours, and the level of IL-2 in  
254 the culture supernatant was measured by ELISA (Figure 1C). The FAP-negative U251 GBM cell  
255 line was used as a negative control. The data indicate that FAP-T cells responded specifically  
256 to target cells expressing FAP.

257

### 258 ***Cytotoxicity of FAP-CAR-T cells against GBM cell lines and patient-derived glioma neural*** 259 ***stem (GNS) cells***

260 We next used impedance-based real-time analysis to assess FAP-T cell cytotoxicity. The FAP-  
261 expressing U87 human GBM cell line was used as the target in this assay (Figure 2A) and  
262 compared with the FAP-negative GBM cell line U251. As expected, FAP-T cells were strongly

263 cytotoxic against U87 target cells, whereas non-transduced T cells (NT-T) induced only  
264 minimal background lysis. FAP<sup>-</sup>T cells failed to lyse U251 cells above background levels,  
265 thereby confirming the specificity of the CAR.

266 Although long-term established cell lines such as U87 provide a suitable model to test a  
267 diverse range of therapeutic approaches, these cells may not adequately represent primary  
268 GBM cells. Therefore, we next selected a panel of patient-derived glioma neural stem (GNS)  
269 cells as a more biologically relevant type of target cell to test the cytotoxic activity of our FAP-  
270 T cells. We checked a panel of different GNS cells for FAP expression and chose three cultures  
271 which express different levels of FAP. CCB-G3-C, MN1, and CCB-G6-T are representative of  
272 high, medium, and low level FAP expression, respectively (Figure 2B). We found substantial  
273 killing of all of three GNS cell lines (Figure 2B). Of note, when cultured with MN1 cells, which  
274 are <50% FAP(+), the FAP-T cells induced near-complete cytotoxicity (> 90% lysis). Even more  
275 remarkably, in the case of CCB-G6-T cells, even a 10% FAP(+) population was sufficient to  
276 induce the lysis of >80% of all target cells.

277 Hence, our observations in the real-time cytotoxicity assay suggested a potential bystander  
278 killing mechanism in this system (28). We therefore used flow cytometry to further investigate  
279 the effect of FAP-T cells on FAP(+) and FAP(-) subpopulations of the CCB-G6-T cell line. CCB-  
280 G6-T target cells were co-cultured with FAP-T cells for 48 hours. After this time, the small  
281 FAP(+) population within CCB-G6-T was depleted from 6.5% to 1.5%, as expected. Notably,  
282 however, the total loss in cell viability was ~70%, far more than the FAP(+) population, further  
283 suggesting a bystander killing effect of FAP-T cells (Figure S1).

284

285 ***Confirmation that FAP-CAR-T cells induce antigen-dependent bystander killing of tumor cells***

286 One question is whether the bystander killing was mediated by low-level expression of FAP,  
287 which was not detected by flow cytometry but was still sufficient to trigger CAR-T killing. If  
288 bystander cytotoxicity is genuine, then killing of antigen-negative target cells should be  
289 observed only after the CAR-T cells are activated by antigen-positive target cells. To test this,  
290 we labeled FAP(+) GNS cell lines with a fluorescent dye (CellTrace Far Red; CTFR) and mixed  
291 them with unlabeled GNS cells lacking FAP expression. This target-cell mixture was incubated  
292 with FAP-T cells or NT-T cells for 48 hours and the viability of each target-cell population was  
293 analyzed by flow cytometry (Figure 3A). Two different pairs of FAP(+)/FAP(-) GNS cell lines  
294 were used- Pair 1: FAP(+) MN1 with FAP(-) RKI1, and pair 2: FAP(+) CCB-G3-C with FAP(-) SJH1.  
295 Whereas MN1 and CCB-G3-C cells showed uniform expression of FAP by flow cytometry, RKI1  
296 and SJH1 cells lacked any detectable surface expression (Figure 3B). These FAP-negative GNS  
297 cells also lacked significant gene expression by microarray analysis (data not shown).

298 As expected, the viability of FAP-negative tumor cells cultured alone was not affected by  
299 incubation with FAP-T cells, thereby ruling out off-target effects. But when FAP(-) target cells  
300 were mixed with FAP(+) target cells and subsequently incubated with FAP-T cells, significant  
301 killing of the FAP(-) tumor cells was observed (Figure 3C-D). Thus, FAP-T cells can exert  
302 substantial bystander killing of tumor cells lacking FAP, but only once they have been  
303 activated by cells expressing their cognate antigen. To determine if the bystander killing effect  
304 is unique to FAP-T cells, we also tested GD2-specific CAR-T cells on GNS cells expressing low  
305 levels of GD2 (16-26% GD2+). Real-time cytotoxicity assays revealed complete lysis of these

306 target cells despite heterogeneous antigen expression (Figure S2), thus suggesting that the  
307 bystander killing activity of CAR-T cells is not restricted to a particular CAR.

308

309 ***Bystander cytotoxicity occurs independently of Fas/FasL but can be mediated by soluble***  
310 ***factors***

311 Bystander killing of antigen-negative targets has recently been reported to occur via Fas-FasL  
312 interactions(28). To determine if this molecular axis was at play in our system, we first  
313 investigated expression of Fas on our GNS cell lines, and expression of FasL on our FAP-T cells.  
314 Although variable levels of Fas were detected on the GNS cell lines (RKI1, SJH1 and CCB-G6-T)  
315 found to be susceptible to bystander killing (Figure S3A), there was almost no expression of  
316 FasL by FAP-T cells, even after co-culture with FAP(+) target cells and with permeabilization to  
317 detect intracellular stores of FasL (Figure S3B). Soluble FasL in culture medium was also low (<  
318 20pg/mL, data not shown). ZB4 was reported as a function-blocking anti-Fas antibody(29). We  
319 confirmed this in our soluble FasL induced cytotoxicity assay (Figure S3C). However, ZB4 failed  
320 to attenuate either direct killing (data not shown) or bystander killing (Figure S3 D-E). We  
321 therefore conclude that bystander killing is unlikely to be mediated by Fas/FasL interactions in  
322 our system.

323 We next hypothesized that soluble factors such as cytokines could contribute to the bystander  
324 killing effect. This was tested by separating antigen-negative target cells from CAR-T cells  
325 using a semi-permeable membrane. FAP-T or NT-T cells were seeded together with FAP(+)  
326 GNS cells in the lower chambers of Transwell assemblies, while FAP(-) GNS cells were seeded



327 in the upper chambers (Figure 4A). After 48 hours, cells in the upper chambers were stained  
328 using propidium iodide (PI) to label dead cells and Hoechst 33342 to visualize total nuclei, and  
329 cell viability calculated by the ratio of PI/Hoechst-stained cells. The same combinations of  
330 FAP(-) SJH-1/FAP(+) CCB-G3C cells and FAP(-) RKI-1/FAP(+) MN-1 cells from Figure 3 were used  
331 in this assay. In keeping with our hypothesis, significant killing of FAP(-) tumor cells in the  
332 upper chamber (SJH-1 or RKI-1) was observed when FAP-T cells were present in the lower  
333 chamber together with FAP(+) tumor cells (Figure 4B-D).

334 Since the Transwell experiments suggested that bystander killing of antigen-negative cells can  
335 be at least partly mediated by soluble factors, a panel of cytokines and cytotoxic proteins was  
336 measured in co-culture supernatants. Large amounts of TNF- $\alpha$ , IFN- $\gamma$ , granzyme A, granzyme B  
337 and granulysin were released when FAP-T cells were co-cultured with FAP(+) GNS cells, but  
338 not when cultured alone (Figure 4E). Perforin was also detected in the co-culture  
339 supernatants but was similarly secreted in the absence of target cells, suggesting constitutive  
340 secretion by FAP-T cells. None of these factors was secreted by NT-T cells, even in the  
341 presence of FAP(+) GNS tumor cells. Together, our results indicate that FAP-T cells can be  
342 activated by antigen to secrete a range of cytotoxic cytokines and proteins, which may  
343 contribute to the contact-independent bystander killing observed in the Transwell system.

344

#### 345 ***FAP-CAR-T cell activation mobilizes the CAR-negative T-cell fraction to enhance cytotoxicity***

346 It has long been recognized that, in addition to antigen-dependent cytotoxicity, T cells can  
347 also undergo cytokine-induced bystander activation (30). Our FAP-T cell products contain

348 ~75% CAR-negative T cells, leading us to hypothesize that CAR-T cells may secrete cytokines to  
349 mobilize the non-transduced T cells into the antitumor response after activation by FAP-  
350 expressing tumor cells (Figure 5A). In this way, the whole population of T cells could be  
351 synchronized to exert cytotoxicity against both antigen-positive and antigen-negative tumor  
352 cells. Cytokines including IL-2, IL-12, IL-15 and IL-21 have been reported to initiate antigen  
353 nonspecific T-cell activation(31-33). And although IL-15 and IL-12 are primarily produced by  
354 antigen presenting cells, IL-2 and IL-21 can be produced by T cells. We showed that IL-2 was  
355 secreted by FAP-T cells after antigen activation (Figure 1D), suggesting that it could be one of  
356 the cytokines to mobilize normal T cells during bystander killing.

357 We performed additional real-time cytotoxicity assays to explore these concepts further by  
358 recapitulating the bystander activation and killing processes in vitro. The cytotoxicity of FAP-T  
359 cells or NT-T cells was tested against MN1 GNS cells expressing moderate levels of FAP, with  
360 or without the addition of exogenous IL-2 (Figure 5B). FAP-T cells displayed strong cytotoxicity  
361 against MN1 as expected, which was further boosted by the addition of IL-2. This effect was  
362 marginal at high E:T ratios but became more pronounced at lower E:T ratios as CAR-  
363 expressing effector cells became limiting. Of note, IL-2 also dramatically increased the  
364 cytotoxicity of control T cells. For example, at a high (5:1) E:T ratio, NT-T cells supplemented  
365 with IL-2 induced as much tumor cell killing as FAP-T cells.

366 We further analyzed cytokines and cytotoxic proteins in supernatant samples collected from  
367 these assays. In addition to IL-2, we measured another 12 analytes (Figure 5C, Figures S4,  
368 Table 1). The addition of IL-2 to NT-T cells significantly increased the levels of all factors except  
369 IL-10 and IL-17a (see column 3 in Table 1), suggesting that these two cytokines were

370 upregulated only by CAR stimulation, not IL-2. Furthermore, by comparing NT-T cells + IL-2 to  
371 CAR-T cells + IL-2, we could show that all factors were further boosted by CAR engagement  
372 except for perforin (see column 4 in Table 1), suggesting that IL-2 alone was sufficient to  
373 induce maximum secretion of soluble perforin. Interestingly, all analytes showed a positive  
374 correlation with the extent of cytotoxicity except soluble Fas and FasL (Table 1, column 2).  
375 These results agree with those from our ZB4 blocking experiment (Figure S3), which did not  
376 support a significant role for the Fas/FasL axis in cytotoxicity in our system.

377 Besides the soluble cytokines, classic innate-like effector molecules such as NKG2D could also  
378 contribute to bystander killing(34). We assessed expression of NKG2D on T cells in the  
379 coculture assay (FAP-T/ NT-T with GNS MN1) and found upregulated NKG2D on CD8(+) T cells,  
380 both on CAR (+) and CAR (-) populations, but not on the NT-T cells unless IL-2 was added,  
381 which provides further evidence to support our bystander killing model (Figure S5).

382 In summary, our findings suggest that cytokines, such as IL-2 used here, can stimulate the  
383 non-transduced fraction of a CAR-T cell product also to mediate tumor cell killing.

384 Furthermore, this amplification of the response may be an important aspect of the bystander  
385 killing mechanism, because IL-2 also upregulated the secretion of factors such as TNF $\alpha$ , IFN $\gamma$ ,  
386 granzyme and granulysin, which are candidate mediators of bystander killing. Other cytokines  
387 upregulated in this system (IL-4, IL-6, IL-10, and IL-17) are not directly involved in cytotoxicity  
388 but can support T- and B-cell function.

389

390 ***FAP- T cells control the growth of tumors and increase survival time in a subcutaneous GBM***  
391 ***xenograft model despite heterogeneous antigen expression.***

392 To assess the function of our CAR-T cells in vivo, we tested their ability to control the growth  
393 of subcutaneous human xenograft tumors in immunodeficient (NSG) mice. GBM tumors are  
394 well-known for their cellular heterogeneity, and we have shown that expression of FAP by  
395 GBM tumor cells is also heterogeneous(17). Accordingly, we generated a model with mixed  
396 FAP(+) and FAP(-) cells. FAP(+) U87 cells were engineered to express RFP, while FAP(-) U251  
397 cells were engineered to express GFP, to allow monitoring of the mixed tumor cell  
398 populations. In an initial in vitro assay, the single target cell populations or the target cell  
399 mixture were co-cultured with FAP-T cells or NT-T cells and surviving cells were counted using  
400 fluorescence microscopy 24 hours later. Counts of FAP(-) U251 cells were reduced significantly  
401 only in co-cultures of U87 cells and FAP-T cells, suggesting that antigen-negative tumor cells  
402 U251 are also susceptible to bystander killing from FAP-T cells (Figure 6A), like our earlier  
403 observations using GNS cells.

404 The fluorescently tagged U87 and U251 cell lines were mixed at a 2:1 ratio, respectively,  
405 before subcutaneous implantation in each flank of NSG mice. The 2:1 mixing ratio was  
406 selected after an initial pilot study and resulted in the most evenly balanced tumors at  
407 endpoint (Figure 6B, S6 A-B). Compared to either NT-T cells or no treatment, intravenous  
408 administration of a low dose ( $1 \times 10^6$ ) of FAP-T cells significantly reduced tumor growth  
409 (adjusted  $p < 0.0001$  by Type II ANOVA for both control comparisons; Figure 6C), and  
410 significantly increased survival time of treated mice (both  $p < 0.0001$  by Log-Rank test; Figure  
411 6D). In mice treated with FAP-T cells, both the GFP and RFP signals in necropsied tumor

412 tissues were significantly reduced compared to tumors in either control group (Figure 6E),  
413 suggesting CAR-T cell targeting of both FAP(+) U87-RFP and FAP(-) U251-GFP cells. These  
414 findings support the effectiveness of our FAP-T cells in controlling the growth of GBM cells in  
415 vivo, even in the face of heterogeneous expression of target antigen.

416

## 417 **Discussion**

418 For many years, FAP has been recognized and tested as a promising immunotherapy target for  
419 carcinomas and mesothelioma(11-16). More recently, we have proposed FAP as a candidate  
420 immunotherapy target antigen for GBM(17). Studies from our group and others have shown  
421 that, in GBM, FAP is heterogeneously expressed on tumor cells themselves, and more  
422 consistently by tumor-supporting stromal populations including endothelial cells (ECs) and  
423 pericytes. This sits in sharp contrast to the limited expression in healthy tissues and  
424 vessels(17,35). Despite all these characteristics, FAP has never been tested as a target antigen  
425 for immunotherapeutic strategies in GBM.

426 GBM has striking tumor heterogeneity(36). Moreover, GBM tumors, like many other cancers,  
427 are proposed to have a hierarchical organization originating from cancer stem-like cell  
428 proliferation and differentiation(37,38). For initial confirmation of targeting specificity, we  
429 used long-term cell lines including U87 and U251, and these studies successfully  
430 demonstrated that our FAP-CAR-T cells secrete IL-2 and induce cytolysis only when FAP is  
431 expressed. However, these cell lines (which have been cultured for many decades in vitro in  
432 the presence of xenogeneic serum) may lose multipotency, develop pro-survival mechanisms  
433 and fail to model the disease properly(39). For further in vitro testing, we therefore moved to  
434 the use of glioma neural stem (GNS) cell lines, which are patient GBM tissue-derived cells  
435 expanded under serum-free conditions to a limited passage number (generally < 30) and  
436 maintain a more in vivo-like phenotype(17,38). Our group has developed a panel of GNS cells  
437 from patient samples and characterized them for FAP expression(17) and we used these GNS

438 cells, together with those from the Q-Cell resource(40) as in vitro models to investigate more  
439 authentically how our CAR-T cells tackle the heterogeneity of GBM.

440 Our results using GNS cells in a sensitive real-time cytotoxicity assay indicated that the  
441 percentage of cells lysed by FAP-CAR-T cells can greatly exceed the percentage of target cells  
442 expressing the antigen. Further flow cytometry-based analysis of co-cultured GNS cells  
443 confirmed that FAP-CAR-T cells can kill antigen-negative tumor cells, but only in the presence  
444 of antigen-positive tumor cells. These CAR-T cells are therefore capable of ‘bystander’ killing, a  
445 phenomenon long recognized in T-cell immunology but less well understood(41,42). The  
446 significance of bystander killing in CAR-T cell function is also just beginning to be  
447 appreciated(28,43), and many questions remain. For example, it is unclear whether all CAR-T  
448 cell products have bystander killing capacity, or does this depend on factors such as CAR  
449 structure or target cell susceptibility? Based on our observation (Fig. 3, S2), we believe that  
450 this function may be a general feature of CAR-T mediated toxicity and has been generally  
451 underappreciated in the field because it will not have been revealed in such short-term  
452 cytotoxicity assays as the classical chromium release assay. By using the novel Maestro Z  
453 instrument to track target cell destruction over several days, we allow CAR-T cells the time  
454 required to be activated by CAR engagement with antigen-positive tumor cells and then  
455 deploy a range of cytotoxic mechanisms against antigen-negative tumor cells. Therefore, it is  
456 possible that all CAR-T cell populations can perform bystander killing, but an assay with a long  
457 enough observation period is required to record this phenomenon.

458 Another important question regarding bystander killing is: what are the key effector  
459 molecules that drive this process? The major killing mechanism described for CAR-T cells has

460 been direct cytolysis, which is induced by perforin and granzyme and which is delivered via a  
461 CAR-mediated immunologic synapse(44). Recent studies have suggested that the Fas/FasL  
462 signaling axis participates in CAR-T cell cytotoxicity, and in bystander killing (28,43). In  
463 contrast, we did not find evidence that Fas/FasL contributes to bystander killing (or  
464 cytotoxicity in general) by FAP-CAR- T cells. We did, however, observe that the bystander  
465 killing effect was at least partly mediated by soluble factors, as significant cytotoxicity was  
466 observed even when the CAR-T cells and tumor cells were not in direct contact. Determining  
467 exactly which secreted factor or factors drive bystander killing by FAP-T cells is beyond the  
468 scope of the present study. However, we did detect secretion of a range of cytokines and  
469 cytotoxic granule components upon antigen engagement of FAP-T cells. Two cytokines of  
470 particular interest are TNF $\alpha$  and IFN $\gamma$ , both of which have a direct antitumor effect(45,46).  
471 Moreover, TNF has previously been shown to play a critical role in CAR-T cell antitumor  
472 activity(47). We also detected secretion of surprisingly high levels of molecules such as  
473 granzyme B and perforin, which are normally involved in cytotoxicity mediated by  
474 immunologic synapse formation. Whether these molecules mediate cytotoxicity when  
475 secreted into the surrounding environment is unclear. Recombinant granzyme B has been  
476 reported to mediate apoptosis through Hsp70 internalization(48) and further study is  
477 warranted to determine whether natural granzyme B can mediate cytotoxicity through the  
478 Hsp70 pathway in our system. Granzyme A has far weaker apoptotic activity than Granzyme  
479 B(49). The role of perforin in antigen nonspecific killing is unclear, with contradictory results  
480 reported(32,50,51). It is unlikely for freely diffusing perforin to mediate cytotoxicity here  
481 because direct contact is probably essential. Granulysin is an antimicrobial peptide, but recent  
482 evidence suggests it has antitumor effects(52). One potential mechanism is mediated by



483 extracellular vesicles(53) and, hence, we cannot rule out a role for granulysin in the bystander  
484 killing effect. Also, it should be noted that multiple proinflammatory cytokines can exert  
485 synergistic cytotoxicity(54).

486 Other than direct cytotoxicity by CAR-T cells, we postulate that the non-transduced fraction of  
487 a CAR-T cell product significantly contributes to killing of both antigen-positive and antigen-  
488 negative tumor cells. Bystander activation of T cells has been observed during viral or  
489 bacterial infection and involves activation of T cells in a T-cell receptor-independent and  
490 cytokine-dependent manner. IL-18 and IL-15 are important factors that induce bystander  
491 activation of T cells(55). In tumor immunology, antigen nonspecific T-cell activation plays an  
492 important role in tumor control(30). IL-2 and IL-15 can convert T cells to lymphokine-activated  
493 killer (LAK) cells and exert cytotoxicity through antigen-independent mechanisms(32,33).

494 Of particular interest is IL-2, which was the first chemokine approved for human cancer  
495 therapy(56). IL-2 is a master cytokine, which shapes the proliferation, differentiation and  
496 function of T cells and which can regulate the cytolytic machinery of T cells, including  
497 upregulation of perforin, Granzyme A/B and other proteins required for cytolytic granule  
498 fusion(57). In this study, we hypothesize that when stimulated by antigen, CAR-T cells can  
499 produce cytokines such as IL-2, which will induce the non-transduced T cells to exert  
500 cytotoxicity via antigen-independent mechanisms. We recapitulated this effect through an in  
501 vitro cytotoxicity assay, in which the cytotoxicity of normal T cells was promoted with IL-2 (Fig.  
502 5). This IL-2-dependent function may serve to further broaden the antitumor effect of CAR-T  
503 products. Besides soluble cytokines, classic innate-like effector molecules such as NKG2D may  
504 also contribute to bystander killing(32,34) (Fig. S5). Accordingly, the observed bystander

505 activation and bystander cytotoxicity may represent a mechanism that bridges innate and  
506 adaptive antitumor immunity.

507 To mimic the heterogeneity of GBM in vivo, we developed a mixed tumor model in which  
508 fluorescently tagged U87 and U251 cells were combined in an optimized ratio to produce  
509 tumors that had both cell types still present at endpoint. Using this model, we have shown  
510 that FAP-CAR-T cells, administered in a single intravenous dose, can significantly delay tumor  
511 growth despite antigen heterogeneity. Analysis of tumor tissues at endpoint revealed that  
512 both U87 FAP(+) and U251 FAP(-) cells were reduced following FAP-T cell treatment,  
513 suggesting that the CAR-T cells exert longitudinal control over both U251 and U87 cells. In  
514 these tumors, there were large areas of non-fluorescent tissue, which may come from two  
515 sources: nonfluorescent tumor cells that finally escape immune control or infiltrating mouse-  
516 derived stromal tissue(58).

517 Our observations suggest that bystander killing mechanisms may enable CAR-T cells to target  
518 more tumor cells than would be predicted from the target antigen expression pattern, and  
519 thus may contribute to tumor destruction even in the presence of tumor heterogeneity.

520 Similar or more potent bystander killing effects may be observed by arming CAR-T cells with  
521 cytokines such as IL-15(59,60) or IL-2(61), which may be safer than systematically  
522 administered cytokine therapy. It was estimated, for example, that under physiologic  
523 conditions in dense tissues such as lymph nodes, the cytokine IL-2, interacts over a  
524 characteristic length scale of 8-14 cell diameters (80-140  $\mu\text{m}$ ), which is determined by a  
525 balance between diffusion and consumption of cytokine(62). Therefore, we might expect that

526 bystander killing effects, which are mediated by soluble factors, may be limited to the tumor  
527 microenvironment where CAR-T cells engage with antigen.

528 In this study, we have developed a novel FAP-targeting CAR and shown, for the first time, that  
529 FAP-T cells effectively destroy GBM cells in vitro and in vivo. In addition, we highlight two  
530 mechanisms that broaden the anti-tumor effect of our CAR-T cell product: bystander killing of  
531 antigen-negative tumor cells, and cytokine-mediated bystander T-cell activation. Future work  
532 to better understand these mechanisms may reveal opportunities to enhance CAR-T cell  
533 function and promote more effective clearance of heterogenous solid tumors, a strategy that  
534 may be further augmented by multi-antigen targeting.

535

## 536 **Acknowledgements**

537 We thank Professors Klaus Pfizenmaier (Institute of Cell Biology and Immunology, University  
538 of Stuttgart, Stuttgart, Germany), and Stephen Gottschalk (Department of Bone Marrow  
539 Transplantation and Cellular Therapy, St Jude Children's Research Hospital, Memphis, TN,  
540 USA), for provision of the FAP-specific MO36 scFv. We thank Professor Stuart Pitson, Centre  
541 for Cancer Biology, Adelaide, for the kind gift of U251-GFP and U87-RFP. We thank Dr Susanne  
542 Heinzel, Walter and Eliza Hall Institute of Medical Research, Melbourne Victoria, Australia, for  
543 her review and valuable comments on the manuscript.

544

545

## 546 References:

- 547 1. Field KM, Simes J, Nowak AK, Cher L, Wheeler H, Hovey EJ, *et al.* Randomized phase 2 study of  
548 carboplatin and bevacizumab in recurrent glioblastoma. *Neuro Oncol* **2015**;17(11):1504-13 doi  
549 10.1093/neuonc/nov104.
- 550 2. Wagner J, Wickman E, DeRenzo C, Gottschalk S. CAR T Cell Therapy for Solid Tumors: Bright  
551 Future or Dark Reality? *Mol Ther* **2020**;28(11):2320-39 doi 10.1016/j.ymthe.2020.09.015.
- 552 3. Brown MP, Ebert LM, Gargett T. Clinical chimeric antigen receptor-T cell therapy: a new and  
553 promising treatment modality for glioblastoma. *Clin Transl Immunology* **2019**;8(5):e1050 doi  
554 10.1002/cti2.1050.
- 555 4. Ahmed N, Salsman VS, Kew Y, Shaffer D, Powell S, Zhang YJ, *et al.* HER2-specific T cells target  
556 primary glioblastoma stem cells and induce regression of autologous experimental tumors.  
557 *Clin Cancer Res* **2010**;16(2):474-85 doi 10.1158/1078-0432.CCR-09-1322.
- 558 5. Brown CE, Badie B, Barish ME, Weng L, Ostberg JR, Chang WC, *et al.* Bioactivity and Safety of  
559 IL13Ralpha2-Redirected Chimeric Antigen Receptor CD8+ T Cells in Patients with Recurrent  
560 Glioblastoma. *Clin Cancer Res* **2015**;21(18):4062-72 doi 10.1158/1078-0432.CCR-15-0428.
- 561 6. Brown CE, Alizadeh D, Starr R, Weng L, Wagner JR, Naranjo A, *et al.* Regression of Glioblastoma  
562 after Chimeric Antigen Receptor T-Cell Therapy. *N Engl J Med* **2016**;375(26):2561-9 doi  
563 10.1056/NEJMoa1610497.
- 564 7. O'Rourke DM, Nasrallah MP, Desai A, Melenhorst JJ, Mansfield K, Morrissette JJD, *et al.* A  
565 single dose of peripherally infused EGFRVIII-directed CAR T cells mediates antigen loss and  
566 induces adaptive resistance in patients with recurrent glioblastoma. *Sci Transl Med*  
567 **2017**;9(399) doi 10.1126/scitranslmed.aaa0984.
- 568 8. Brown CE, Aguilar B, Starr R, Yang X, Chang WC, Weng L, *et al.* Optimization of IL13Ralpha2-  
569 Targeted Chimeric Antigen Receptor T Cells for Improved Anti-tumor Efficacy against  
570 Glioblastoma. *Mol Ther* **2018**;26(1):31-44 doi 10.1016/j.ymthe.2017.10.002.
- 571 9. Goff SL, Morgan RA, Yang JC, Sherry RM, Robbins PF, Restifo NP, *et al.* Pilot Trial of Adoptive  
572 Transfer of Chimeric Antigen Receptor-transduced T Cells Targeting EGFRVIII in Patients With  
573 Glioblastoma. *J Immunother* **2019**;42(4):126-35 doi 10.1097/CJI.0000000000000260.
- 574 10. Rettig WJ, Garin-Chesa P, Beresford HR, Oettgen HF, Melamed MR, Old LJ. Cell-surface  
575 glycoproteins of human sarcomas: differential expression in normal and malignant tissues and  
576 cultured cells. *Proc Natl Acad Sci U S A* **1988**;85(9):3110-4 doi 10.1073/pnas.85.9.3110.
- 577 11. Ostermann E, Garin-Chesa P, Heider KH, Kalat M, Lamche H, Puri C, *et al.* Effective  
578 immunoconjugate therapy in cancer models targeting a serine protease of tumor fibroblasts.  
579 *Clin Cancer Res* **2008**;14(14):4584-92 doi 10.1158/1078-0432.CCR-07-5211.
- 580 12. Kakarla S, Chow KK, Mata M, Shaffer DR, Song XT, Wu MF, *et al.* Antitumor effects of chimeric  
581 receptor engineered human T cells directed to tumor stroma. *Mol Ther* **2013**;21(8):1611-20  
582 doi 10.1038/mt.2013.110.
- 583 13. Wang LC, Lo A, Scholler J, Sun J, Majumdar RS, Kapoor V, *et al.* Targeting fibroblast activation  
584 protein in tumor stroma with chimeric antigen receptor T cells can inhibit tumor growth and  
585 augment host immunity without severe toxicity. *Cancer Immunol Res* **2014**;2(2):154-66 doi  
586 10.1158/2326-6066.CIR-13-0027.
- 587 14. Lo A, Wang LS, Scholler J, Monslow J, Avery D, Newick K, *et al.* Tumor-Promoting Desmoplasia  
588 Is Disrupted by Depleting FAP-Expressing Stromal Cells. *Cancer Res* **2015**;75(14):2800-10 doi  
589 10.1158/0008-5472.CAN-14-3041.
- 590 15. Petrusch U, Schuberth PC, Hagedorn C, Soltermann A, Tomaszek S, Stahel R, *et al.* Re-directed  
591 T cells for the treatment of fibroblast activation protein (FAP)-positive malignant pleural  
592 mesothelioma (FAPME-1). *BMC Cancer* **2012**;12:615 doi 10.1186/1471-2407-12-615.

- 593 16. Schuberth PC, Hagedorn C, Jensen SM, Gulati P, van den Broek M, Mischo A, *et al.* Treatment  
594 of malignant pleural mesothelioma by fibroblast activation protein-specific re-directed T cells.  
595 *J Transl Med* **2013**;11:187 doi 10.1186/1479-5876-11-187.
- 596 17. Ebert LM, Yu W, Gargett T, Toubia J, Kollis PM, Tea MN, *et al.* Endothelial, pericyte and tumor  
597 cell expression in glioblastoma identifies fibroblast activation protein (FAP) as an excellent  
598 target for immunotherapy. *Clin Transl Immunology* **2020**;9(10):e1191 doi 10.1002/cti2.1191.
- 599 18. Li M, Li G, Kiyokawa J, Tirmizi Z, Richardson LG, Ning J, *et al.* Characterization and oncolytic  
600 virus targeting of FAP-expressing tumor-associated pericytes in glioblastoma. *Acta*  
601 *Neuropathol Commun* **2020**;8(1):221 doi 10.1186/s40478-020-01096-0.
- 602 19. Tran E, Chinnasamy D, Yu Z, Morgan RA, Lee CC, Restifo NP, *et al.* Immune targeting of  
603 fibroblast activation protein triggers recognition of multipotent bone marrow stromal cells and  
604 cachexia. *J Exp Med* **2013**;210(6):1125-35 doi 10.1084/jem.20130110.
- 605 20. Gulati P, Ruhl J, Kannan A, Pircher M, Schuberth P, Nytko KJ, *et al.* Aberrant Lck Signal via CD28  
606 Costimulation Augments Antigen-Specific Functionality and Tumor Control by Redirected T  
607 Cells with PD-1 Blockade in Humanized Mice. *Clin Cancer Res* **2018**;24(16):3981-93 doi  
608 10.1158/1078-0432.CCR-17-1788.
- 609 21. A. Curioni CB, S. Hiltbrunner, L. Bankel, P. Gulati, W. Weder, I. Opitz, O. Lauk, C. Caviezel, A.  
610 Knuth, C. Muñiz, C. Renner, R.A. Stahel, U. Petrusch. A phase I clinical trial of malignant  
611 pleural mesothelioma treated with locally delivered autologous anti-FAP-targeted CAR T-cells.  
612 *Annals of Oncology* 2019.
- 613 22. Brocks B, Garin-Chesa P, Behrle E, Park JE, Rettig WJ, Pfizenmaier K, *et al.* Species-crossreactive  
614 scFv against the tumor stroma marker "fibroblast activation protein" selected by phage display  
615 from an immunized FAP-/- knock-out mouse. *Mol Med* **2001**;7(7):461-9.
- 616 23. Rahman M, Reyner K, Deleyrolle L, Millette S, Azari H, Day BW, *et al.* Neurosphere and  
617 adherent culture conditions are equivalent for malignant glioma stem cell lines. *Anat Cell Biol*  
618 **2015**;48(1):25-35 doi 10.5115/acb.2015.48.1.25.
- 619 24. Schroeder HW, Jr., Cavacini L. Structure and function of immunoglobulins. *J Allergy Clin*  
620 *Immunol* **2010**;125(2 Suppl 2):S41-52 doi 10.1016/j.jaci.2009.09.046.
- 621 25. Nirula A, Glaser SM, Kalled SL, Taylor FR. What is IgG4? A review of the biology of a unique  
622 immunoglobulin subtype. *Curr Opin Rheumatol* **2011**;23(1):119-24 doi  
623 10.1097/BOR.0b013e3283412fd4.
- 624 26. Hudecek M, Sommermeyer D, Kosasih PL, Silva-Benedict A, Liu L, Rader C, *et al.* The  
625 nonsignaling extracellular spacer domain of chimeric antigen receptors is decisive for in vivo  
626 antitumor activity. *Cancer Immunol Res* **2015**;3(2):125-35 doi 10.1158/2326-6066.CIR-14-0127.
- 627 27. Jonnalagadda M, Mardiros A, Urak R, Wang X, Hoffman LJ, Bernanke A, *et al.* Chimeric antigen  
628 receptors with mutated IgG4 Fc spacer avoid fc receptor binding and improve T cell  
629 persistence and antitumor efficacy. *Mol Ther* **2015**;23(4):757-68 doi 10.1038/mt.2014.208
- 630 S1525-0016(16)30095-8 [pii].
- 631 28. Upadhyay R, Boiarsky JA, Pantsulaia G, Svensson-Arvelund J, Lin MJ, Wroblewska A, *et al.* A  
632 Critical Role for Fas-Mediated Off-Target Tumor Killing in T-cell Immunotherapy. *Cancer Discov*  
633 **2021**;11(3):599-613 doi 10.1158/2159-8290.CD-20-0756.
- 634 29. Bonnotte B, Favre N, Reveneau S, Micheau O, Droin N, Garrido C, *et al.* Cancer cell  
635 sensitization to fas-mediated apoptosis by sodium butyrate. *Cell Death Differ* **1998**;5(6):480-7  
636 doi 10.1038/sj.cdd.4400371.
- 637 30. Monjazeb AM, Hsiao HH, Sckisel GD, Murphy WJ. The role of antigen-specific and non-specific  
638 immunotherapy in the treatment of cancer. *J Immunotoxicol* **2012**;9(3):248-58 doi  
639 10.3109/1547691X.2012.685527.
- 640 31. Ma HL, Whitters MJ, Konz RF, Senices M, Young DA, Grusby MJ, *et al.* IL-21 activates both  
641 innate and adaptive immunity to generate potent antitumor responses that require perforin

- 642 but are independent of IFN-gamma. *J Immunol* **2003**;171(2):608-15 doi  
643 10.4049/jimmunol.171.2.608.
- 644 32. Smyth MJ, Swann J, Kelly JM, Cretney E, Yokoyama WM, Diefenbach A, *et al.* NKG2D  
645 recognition and perforin effector function mediate effective cytokine immunotherapy of  
646 cancer. *J Exp Med* **2004**;200(10):1325-35 doi 10.1084/jem.20041522.
- 647 33. Liu RB, Engels B, Schreiber K, Ciszewski C, Schietinger A, Schreiber H, *et al.* IL-15 in tumor  
648 microenvironment causes rejection of large established tumors by T cells in a noncognate T  
649 cell receptor-dependent manner. *Proc Natl Acad Sci U S A* **2013**;110(20):8158-63 doi  
650 10.1073/pnas.1301022110.
- 651 34. Wensveen FM, Jelencic V, Polic B. NKG2D: A Master Regulator of Immune Cell Responsiveness.  
652 *Front Immunol* **2018**;9:441 doi 10.3389/fimmu.2018.00441.
- 653 35. Busek P, Balaziova E, Matrasova I, Hilser M, Tomas R, Syrucek M, *et al.* Fibroblast activation  
654 protein alpha is expressed by transformed and stromal cells and is associated with  
655 mesenchymal features in glioblastoma. *Tumour Biol* **2016**;37(10):13961-71 doi  
656 10.1007/s13277-016-5274-9.
- 657 36. Perrin SL, Samuel MS, Koszyca B, Brown MP, Ebert LM, Oksdath M, *et al.* Glioblastoma  
658 heterogeneity and the tumour microenvironment: implications for preclinical research and  
659 development of new treatments. *Biochem Soc Trans* **2019**;47(2):625-38 doi  
660 10.1042/BST20180444.
- 661 37. Allegra A, Alonci A, Penna G, Innao V, Gerace D, Rotondo F, *et al.* The cancer stem cell  
662 hypothesis: a guide to potential molecular targets. *Cancer Invest* **2014**;32(9):470-95 doi  
663 10.3109/07357907.2014.958231.
- 664 38. Pollard SM, Yoshikawa K, Clarke ID, Danovi D, Stricker S, Russell R, *et al.* Glioma stem cell lines  
665 expanded in adherent culture have tumor-specific phenotypes and are suitable for chemical  
666 and genetic screens. *Cell Stem Cell* **2009**;4(6):568-80 doi 10.1016/j.stem.2009.03.014.
- 667 39. Galli R, Binda E, Orfanelli U, Cipelletti B, Gritti A, De Vitis S, *et al.* Isolation and characterization  
668 of tumorigenic, stem-like neural precursors from human glioblastoma. *Cancer Res*  
669 **2004**;64(19):7011-21 doi 10.1158/0008-5472.CAN-04-1364.
- 670 40. Stringer BW, Day BW, D'Souza RCJ, Jamieson PR, Ensbeys KS, Bruce ZC, *et al.* A reference  
671 collection of patient-derived cell line and xenograft models of proneural, classical and  
672 mesenchymal glioblastoma. *Sci Rep* **2019**;9(1):4902 doi 10.1038/s41598-019-41277-z.
- 673 41. Fleischer B. Lysis of bystander target cells after triggering of human cytotoxic T lymphocytes.  
674 *Eur J Immunol* **1986**;16(8):1021-4 doi 10.1002/eji.1830160826.
- 675 42. Lanzavecchia A. Is the T-cell receptor involved in T-cell killing? *Nature* **1986**;319(6056):778-80  
676 doi 10.1038/319778a0.
- 677 43. Hong LK, Chen Y, Smith CC, Montgomery SA, Vincent BG, Dotti G, *et al.* CD30-Redirected  
678 Chimeric Antigen Receptor T Cells Target CD30(+) and CD30(-) Embryonal Carcinoma via  
679 Antigen-Dependent and Fas/FasL Interactions. *Cancer Immunol Res* **2018**;6(10):1274-87 doi  
680 10.1158/2326-6066.CIR-18-0065.
- 681 44. Benmeharek MR, Karches CH, Cadilha BL, Lesch S, Endres S, Kobold S. Killing Mechanisms of  
682 Chimeric Antigen Receptor (CAR) T Cells. *Int J Mol Sci* **2019**;20(6) doi 10.3390/ijms20061283.
- 683 45. Zaidi MR. The Interferon-Gamma Paradox in Cancer. *J Interferon Cytokine Res* **2019**;39(1):30-8  
684 doi 10.1089/jir.2018.0087.
- 685 46. Idriss HT, Naismith JH. TNF alpha and the TNF receptor superfamily: structure-function  
686 relationship(s). *Microsc Res Tech* **2000**;50(3):184-95 doi 10.1002/1097-  
687 0029(20000801)50:3<184::AID-JEMT2>3.0.CO;2-H.
- 688 47. Michie J, Beavis PA, Freeman AJ, Vervoort SJ, Ramsbottom KM, Narasimhan V, *et al.*  
689 Antagonism of IAPs Enhances CAR T-cell Efficacy. *Cancer Immunol Res* **2019**;7(2):183-92 doi  
690 10.1158/2326-6066.CIR-18-0428.

- 691 48. Gehrmann M, Stangl S, Kirschner A, Foulds GA, Sievert W, Doss BT, *et al.* Immunotherapeutic  
692 targeting of membrane Hsp70-expressing tumors using recombinant human granzyme B. *PLoS*  
693 *One* **2012**;7(7):e41341 doi 10.1371/journal.pone.0041341.
- 694 49. Trapani JA. Granzymes: a family of lymphocyte granule serine proteases. *Genome Biol*  
695 **2001**;2(12):REVIEWS3014 doi 10.1186/gb-2001-2-12-reviews3014.
- 696 50. Murphy WJ, Welniak L, Back T, Hixon J, Subleski J, Seki N, *et al.* Synergistic anti-tumor  
697 responses after administration of agonistic antibodies to CD40 and IL-2: coordination of  
698 dendritic and CD8+ cell responses. *J Immunol* **2003**;170(5):2727-33 doi  
699 10.4049/jimmunol.170.5.2727.
- 700 51. Berner V, Liu H, Zhou Q, Alderson KL, Sun K, Weiss JM, *et al.* IFN-gamma mediates CD4+ T-cell  
701 loss and impairs secondary antitumor responses after successful initial immunotherapy. *Nat*  
702 *Med* **2007**;13(3):354-60 doi 10.1038/nm1554.
- 703 52. Sparrow E, Bodman-Smith MD. Granulysin: The attractive side of a natural born killer. *Immunol*  
704 *Lett* **2020**;217:126-32 doi 10.1016/j.imlet.2019.11.005.
- 705 53. Wu CH, Li J, Li L, Sun J, Fabbri M, Wayne AS, *et al.* Extracellular vesicles derived from natural  
706 killer cells use multiple cytotoxic proteins and killing mechanisms to target cancer cells. *J*  
707 *Extracell Vesicles* **2019**;8(1):1588538 doi 10.1080/20013078.2019.1588538.
- 708 54. Muroya M, Chang K, Uchida K, Bougaki M, Yamada Y. Analysis of cytotoxicity induced by  
709 proinflammatory cytokines in the human alveolar epithelial cell line A549. *Biosci Trends*  
710 **2012**;6(2):70-80.
- 711 55. Kim TS, Shin EC. The activation of bystander CD8(+) T cells and their roles in viral infection. *Exp*  
712 *Mol Med* **2019**;51(12):1-9 doi 10.1038/s12276-019-0316-1.
- 713 56. Rosenberg SA. IL-2: the first effective immunotherapy for human cancer. *J Immunol*  
714 **2014**;192(12):5451-8 doi 10.4049/jimmunol.1490019.
- 715 57. Rollings CM, Sinclair LV, Brady HJM, Cantrell DA, Ross SH. Interleukin-2 shapes the cytotoxic T  
716 cell proteome and immune environment-sensing programs. *Sci Signal* **2018**;11(526) doi  
717 10.1126/scisignal.aap8112.
- 718 58. Maykel J, Liu JH, Li H, Shultz LD, Greiner DL, Houghton J. NOD-scidII2rg (tm1Wjl) and NOD-Rag1  
719 (null) II2rg (tm1Wjl) : a model for stromal cell-tumor cell interaction for human colon cancer.  
720 *Dig Dis Sci* **2014**;59(6):1169-79 doi 10.1007/s10620-014-3168-5.
- 721 59. Zhou Y, Husman T, Cen X, Tsao T, Brown J, Bajpai A, *et al.* Interleukin 15 in Cell-Based Cancer  
722 Immunotherapy. *Int J Mol Sci* **2022**;23(13) doi 10.3390/ijms23137311.
- 723 60. Gargett T, Ebert LM, Truong NTH, Kollis PM, Sedivakova K, Yu W, *et al.* GD2-targeting CAR-T  
724 cells enhanced by transgenic IL-15 expression are an effective and clinically feasible therapy  
725 for glioblastoma. *J Immunother Cancer* **2022**;10(9) doi 10.1136/jitc-2022-005187.
- 726 61. Allen GM, Frankel NW, Reddy NR, Bhargava HK, Yoshida MA, Stark SR, *et al.* Synthetic cytokine  
727 circuits that drive T cells into immune-excluded tumors. *Science* **2022**;378(6625):eaba1624 doi  
728 10.1126/science.aba1624.
- 729 62. Oyler-Yaniv A, Oyler-Yaniv J, Whitlock BM, Liu Z, Germain RN, Huse M, *et al.* A Tunable  
730 Diffusion-Consumption Mechanism of Cytokine Propagation Enables Plasticity in Cell-to-Cell  
731 Communication in the Immune System. *Immunity* **2017**;46(4):609-20 doi  
732 10.1016/j.immuni.2017.03.011.

733

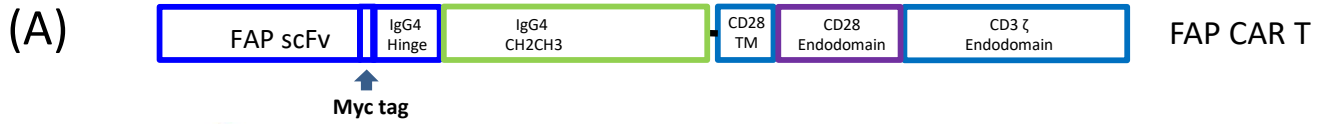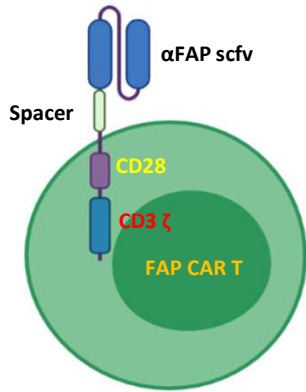

(B)

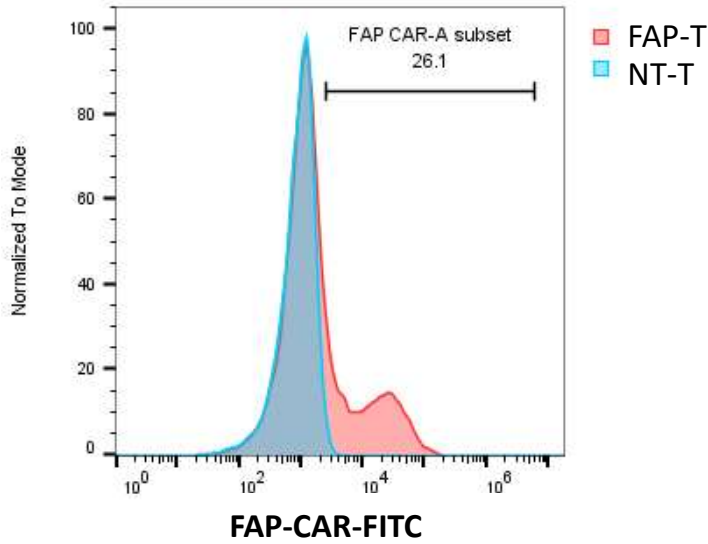

(C)

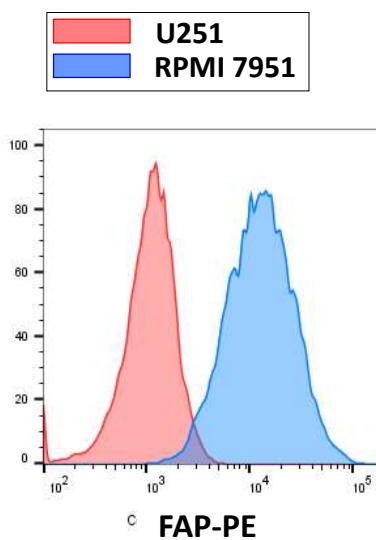

(D)

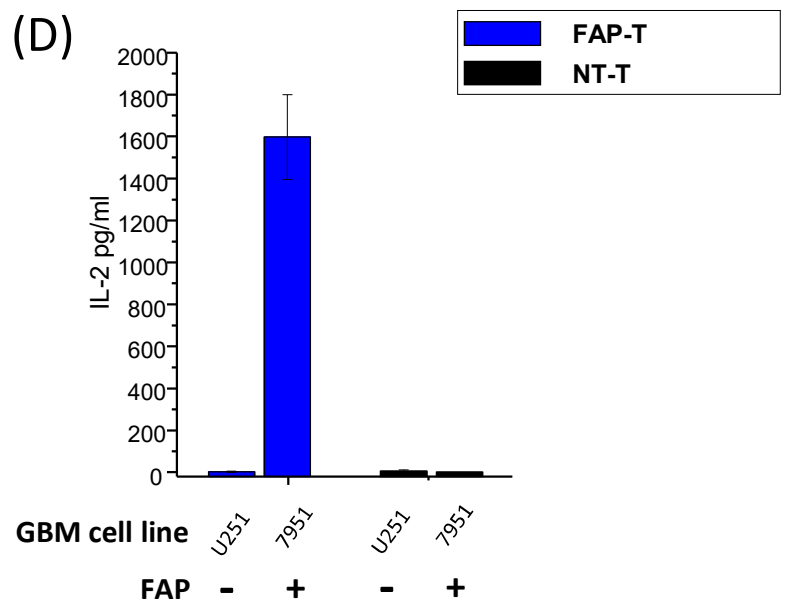



**Figure 1. Structure and expression of FAP CARs. (A)** Schematic representation of the FAP CAR construct. The CAR consisted of anti-FAP scFv linked to a CD28 costimulatory domain and CD3 $\zeta$ . FAP CAR contains the myc tag at the end of the scFv and a spacer from human IgG4 CH2CH3 fragment with modifications. **(B)** CAR expression on CAR-T cells was detected by flow cytometry. The CAR-T cells were stained by FITC conjugated anti-myc tag antibody. **(C)** FAP expression on target cell lines was confirmed by flow cytometry. **(D)** CAR-transduced or non-transduced T cells were co-cultured with target cells and the IL-2 concentration in supernatants determined 48 hours later. Data represent mean  $\pm$  SD from triplicate wells.

**(A) GBM long term cell lines**

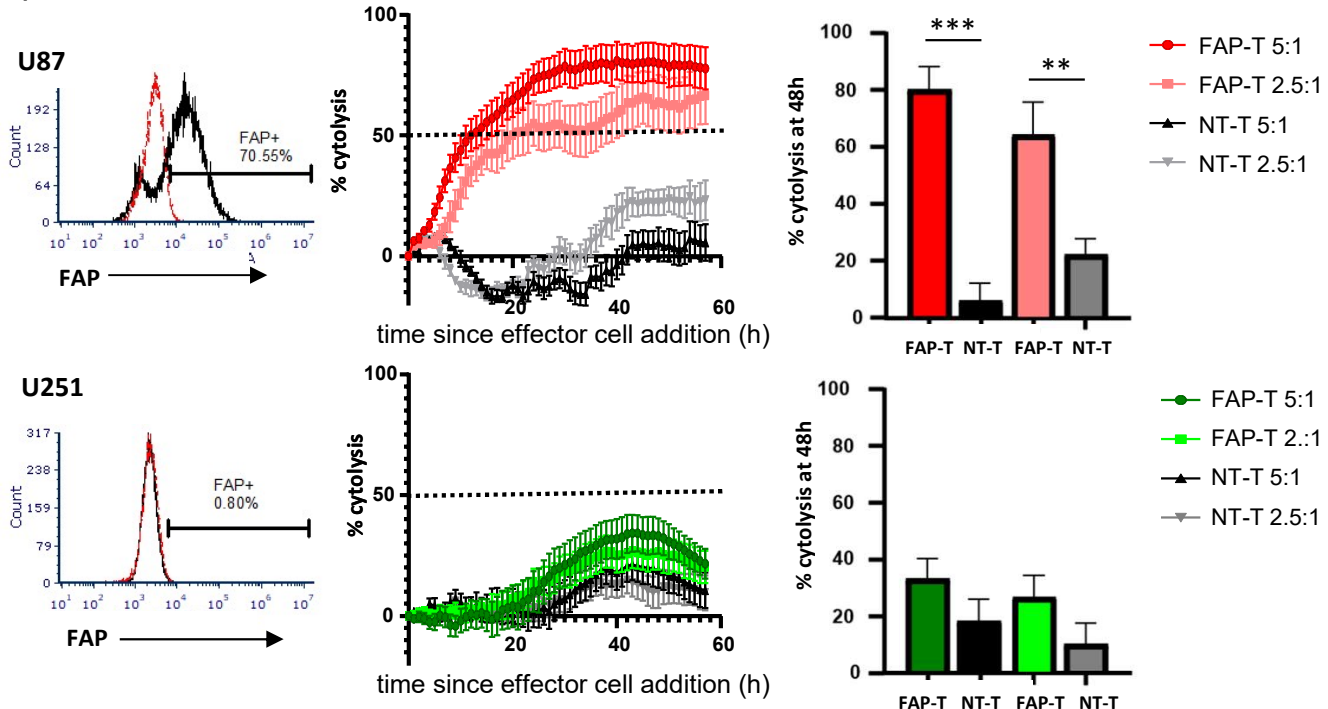

**(B) GNS cells**

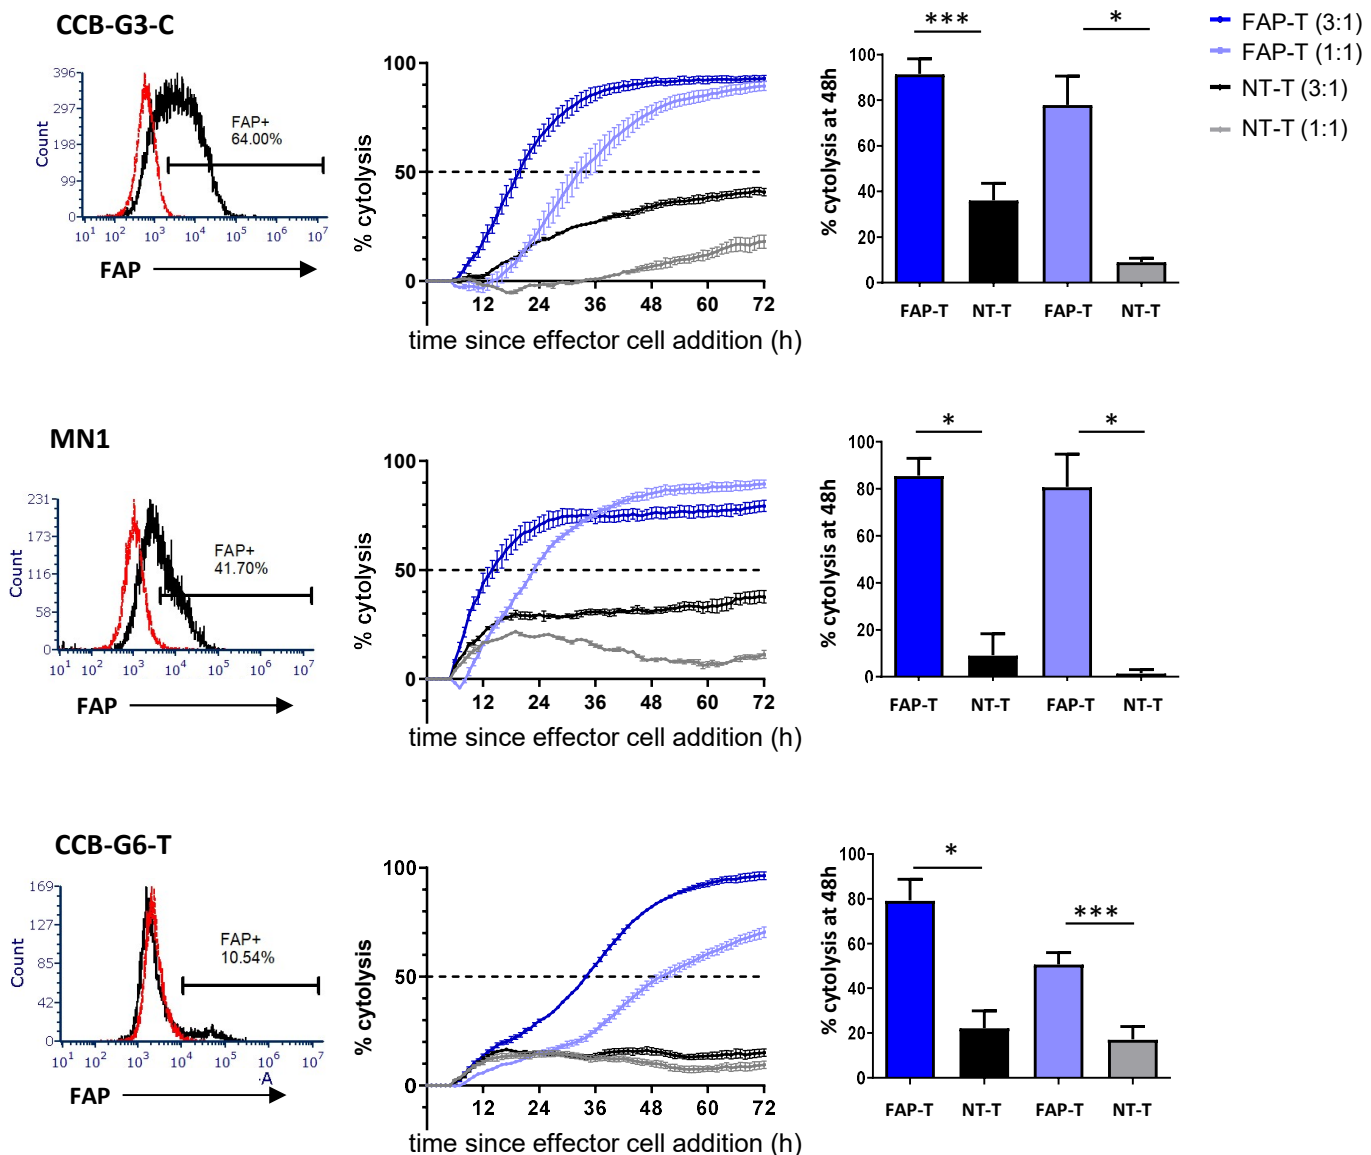

**Figure 2. FAP-T display cytotoxic activity against glioblastoma cell lines and GNS cells expressing varying levels of FAP.** Left panels: FAP expression on target cells was examined by flow cytometry; red dotted lines indicate isotype control while black solid lines indicate anti-FAP antibody. Centre and right panels: Target cells were established in a CytoView-Z plate and placed in the Maestro Z system for up to 24 hours, followed by addition of FAP-T as effectors or non transduced T cells (NT-T) as control. Cytotoxicity was monitored over time and represented as percentage of target lysis averaged across duplicate wells. Representative examples shown in centre panels and % cytolysis at 48 hours after effector cell addition is plotted on the right panels (mean and SEM from 3-4 experiments). The effector:target (E:T) ratio is indicated. **(A)** FAP(+) U87 and FAP(-) U251 cells were used as target cells. **(B)** GNS cells expressing varying levels of FAP were used as target cells.

(A)

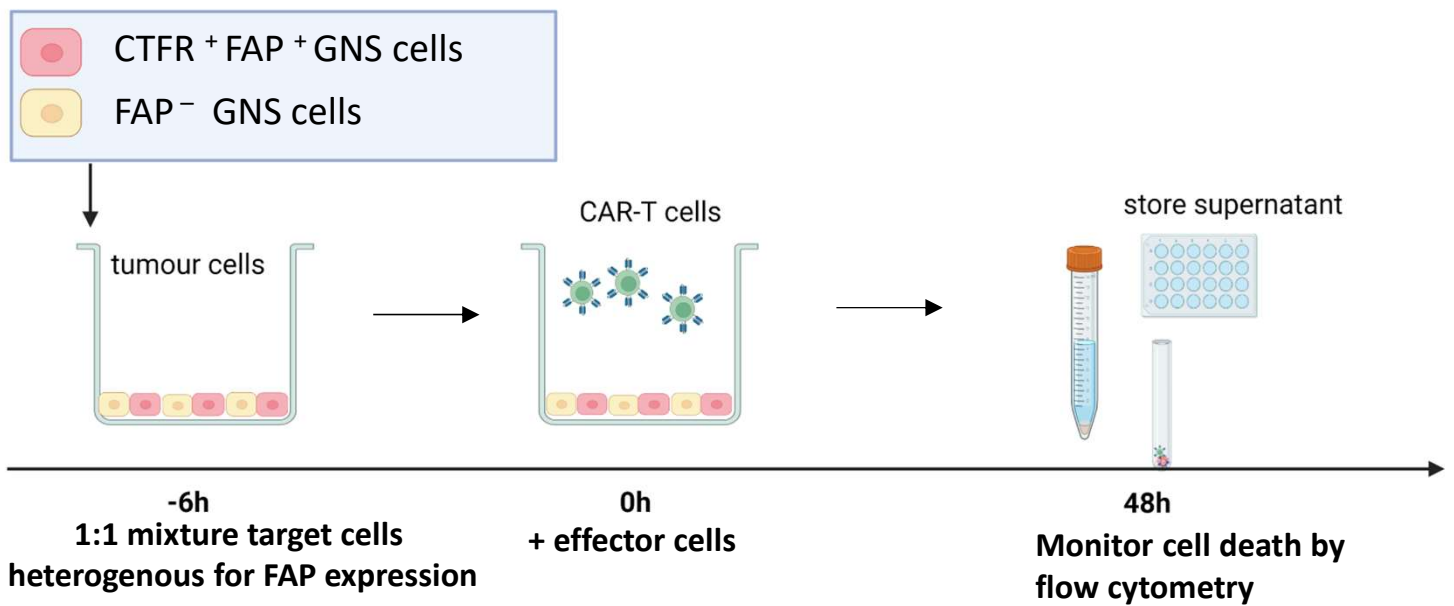

(B)

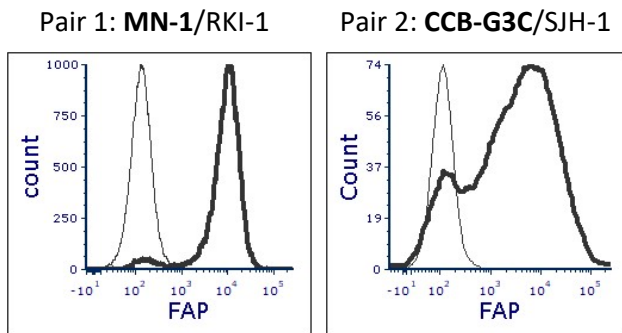

(D)

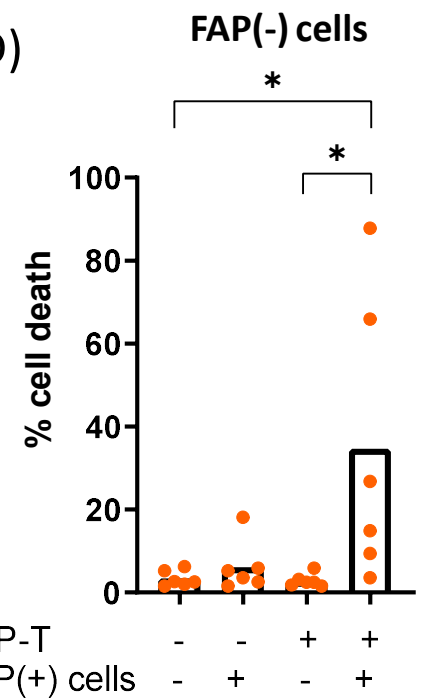

(C)

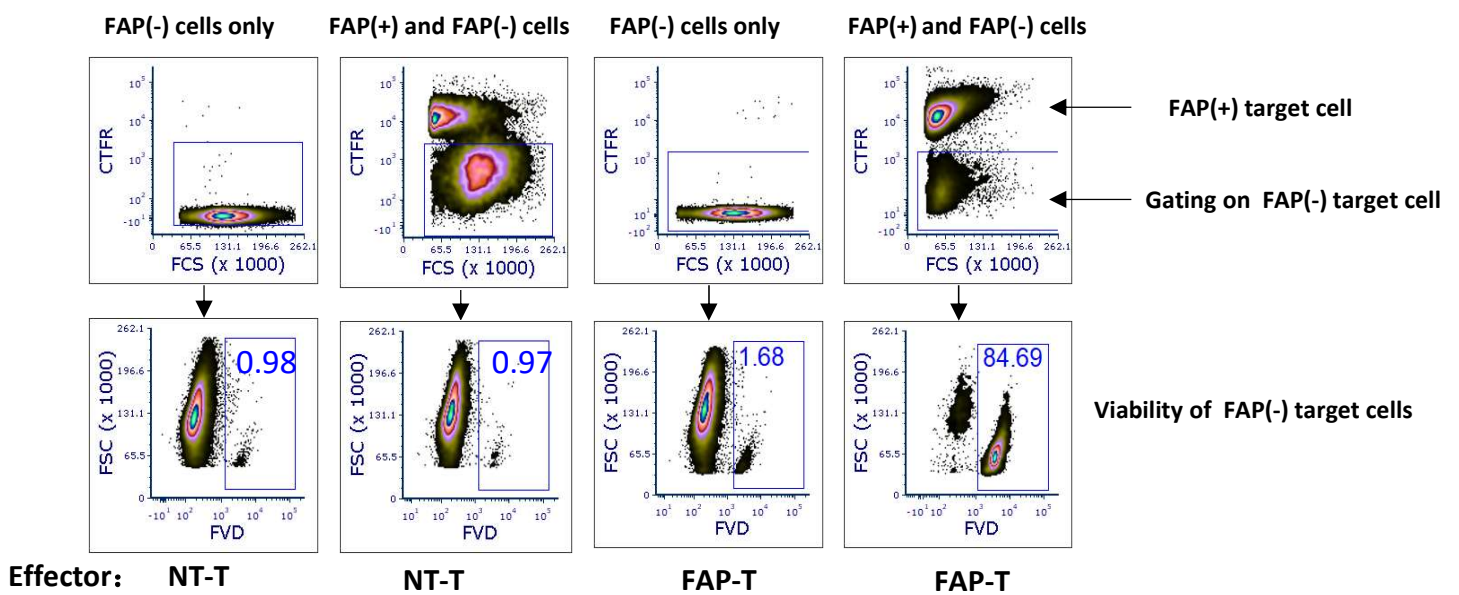

**Figure 3: FAP-T cells exert a bystander killing effect on FAP(-) tumor cells after CAR engagement.** **(A)** Schema illustrates the workflow of co-culture assay: FAP(+) and FAP(-) tumor cells were mixed at 1:1 ratio and treated with either FAP-T cells or non transduced T cells (NT-T) at 1:1 E:T ratio. Single cultured target cells were treated in the same way as control (not illustrated). The viability of target cells was analyzed 48 hours later by flow cytometry. **(B)** Surface expression of FAP on two pairs of target cell lines: FAP(+) MN-1 and FAP(-) RKI-1 on the left, and FAP(+) CCB-G3C and FAP(-) SJH-1 on the right. **(C)** Gating strategy of representative examples from left to right: FAP(-) single tumor plus NT-T cells; FAP(+/-) mixed cells plus NT-T cells; FAP(-) single tumor plus FAP-T cells; FAP(+/-) mixed cells plus FAP-T cells. FAP(+) tumor cells were stained with cell trace far red (CTFR) for discrimination. Fixable viability dye (FVD) was used for viability assay. **(D)** The percentage of cell death of FAP(-) GNS after 48h co-culture from all tests was plotted. Data was pooled from three independent experiments. t test; \* $p < 0.05$ , \*\* $p < 0.005$  (n=6).

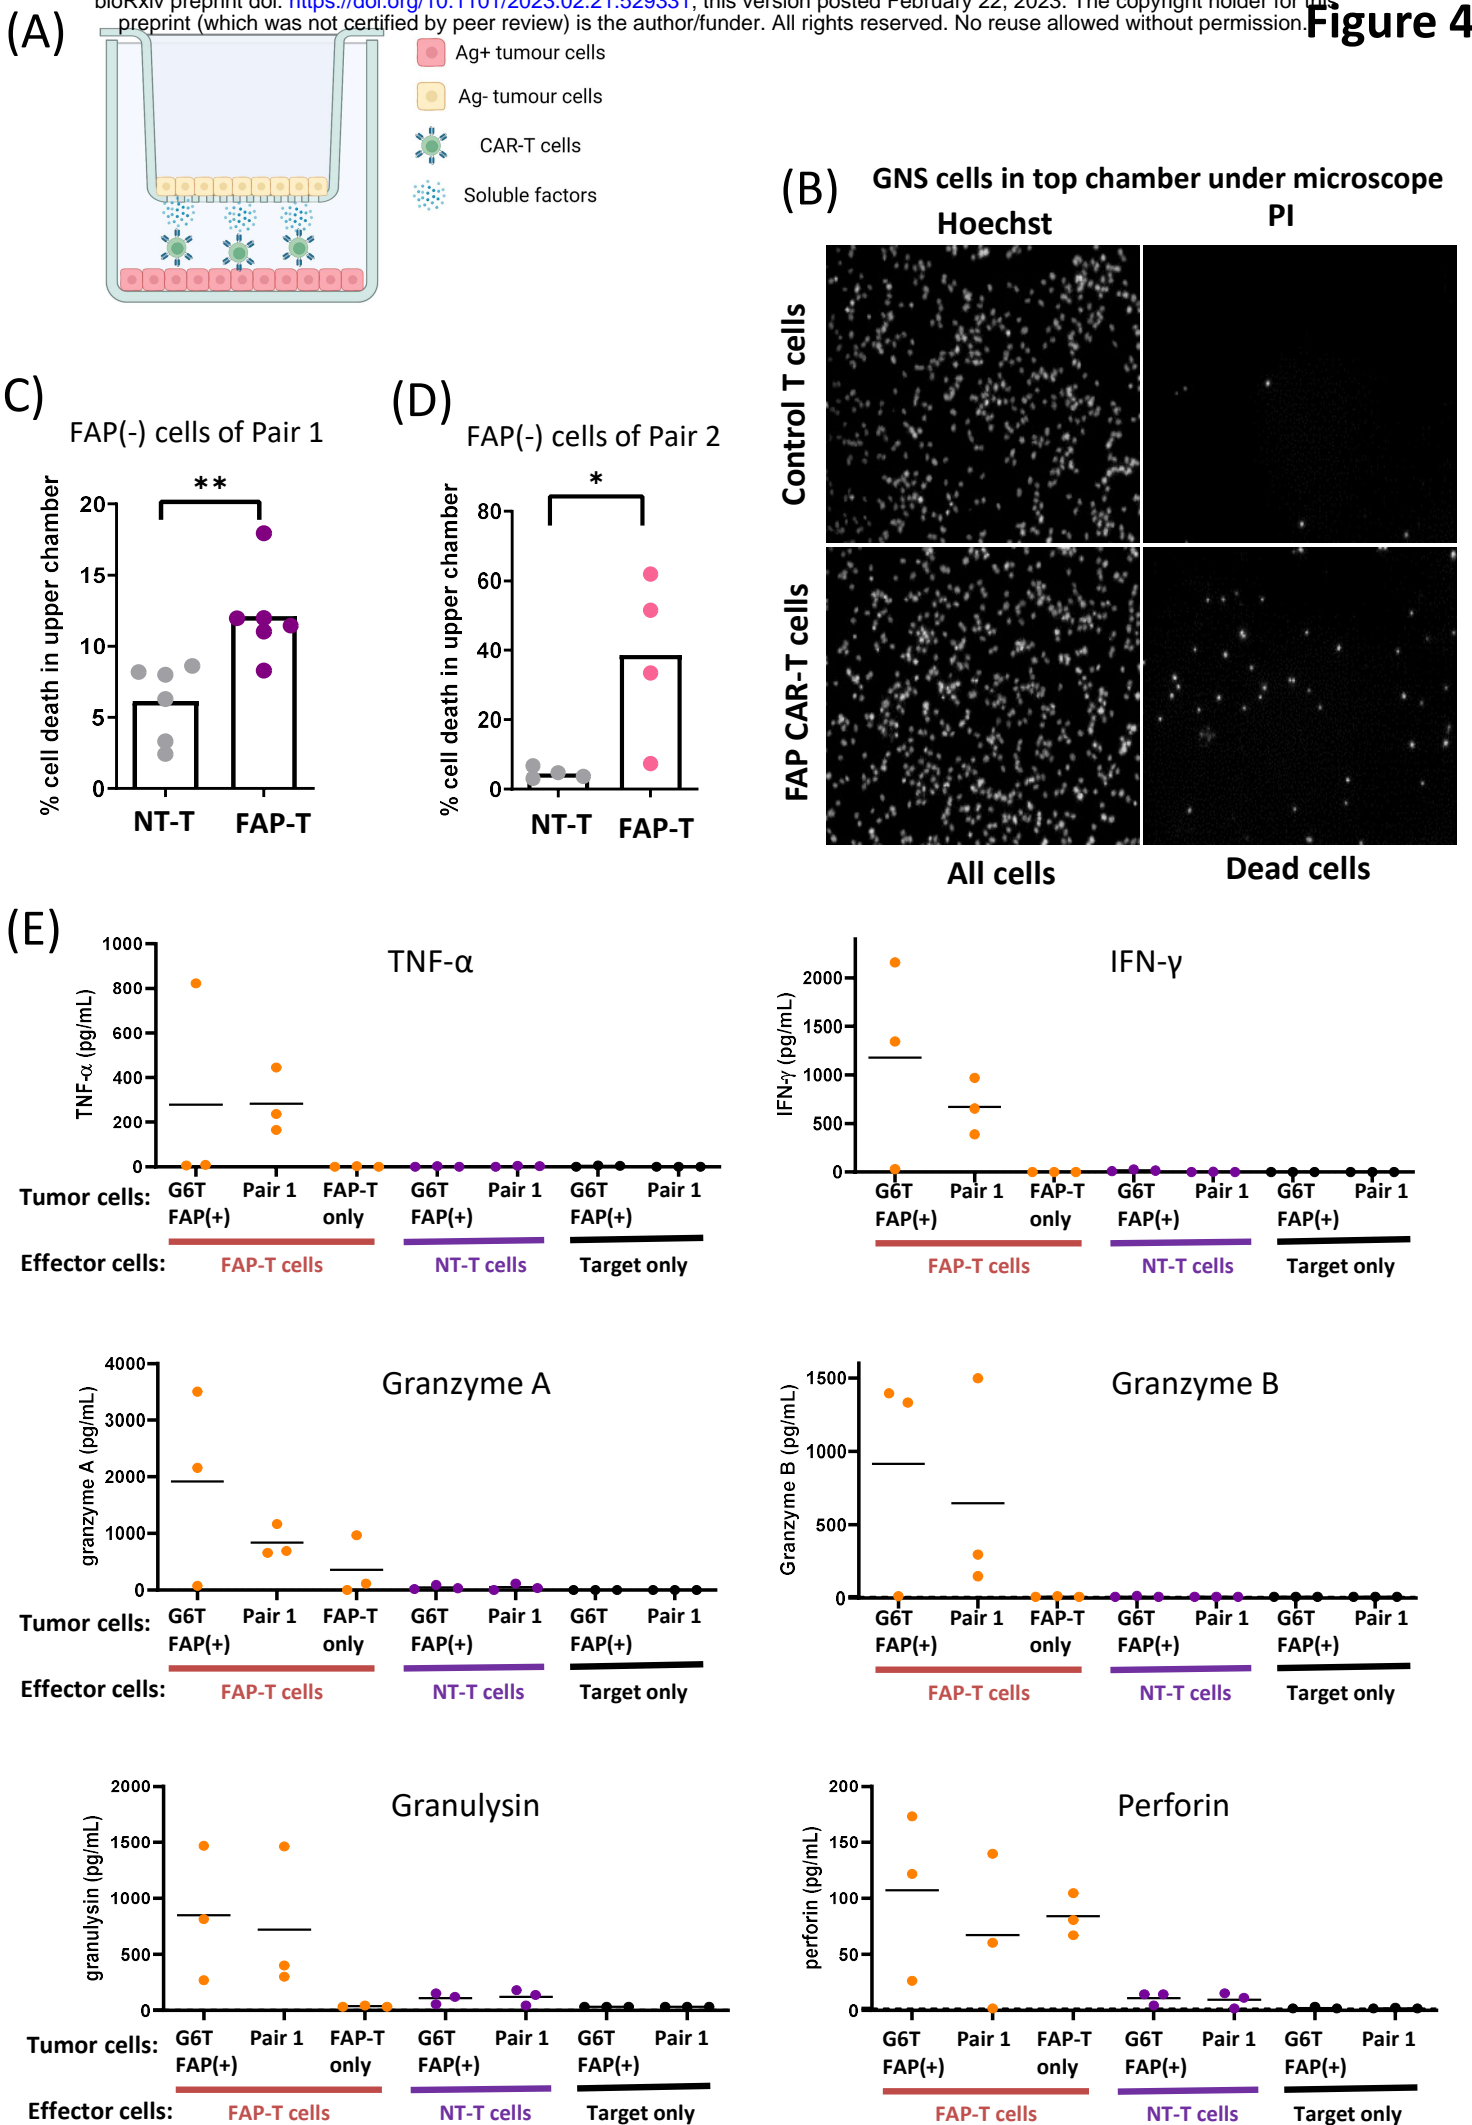

**Figure 4: Bystander killing by FAP-T cells can be mediated by soluble factors. (A)** Schematic of assay set-up. **(B)** Representative fluorescent images of Hoechst 33258 (left) and PI (right) staining on FAP(-) tumor cells cultured in upper chambers for 48 hours. Effector cells (NT-T cells or FAP-T cells) added to lower chambers are indicated. Images were collected using a 10X objective. **(C-D)** Quantification of percent of FAP(-) target cell death in upper chamber. Shown in **C** is RKI-1 from Pair 1, n = 6, pooled from 3 experiments. Shown in **D** is SJH-1 from Pair 2, n = 4 pooled from 2 experiments. Each dot represents the mean percentage of cell death from 3 fields of view of each well. **(E)** Concentrations of secreted factors in supernatants of Pair 1 cocultures were determined by Legendplex kit. FAP-T stimulated by the FAP(+) GNS cell line CCB-G6T was used as positive control. Supernatants were collected after 48 hours. Data are pooled from 3 experiments.

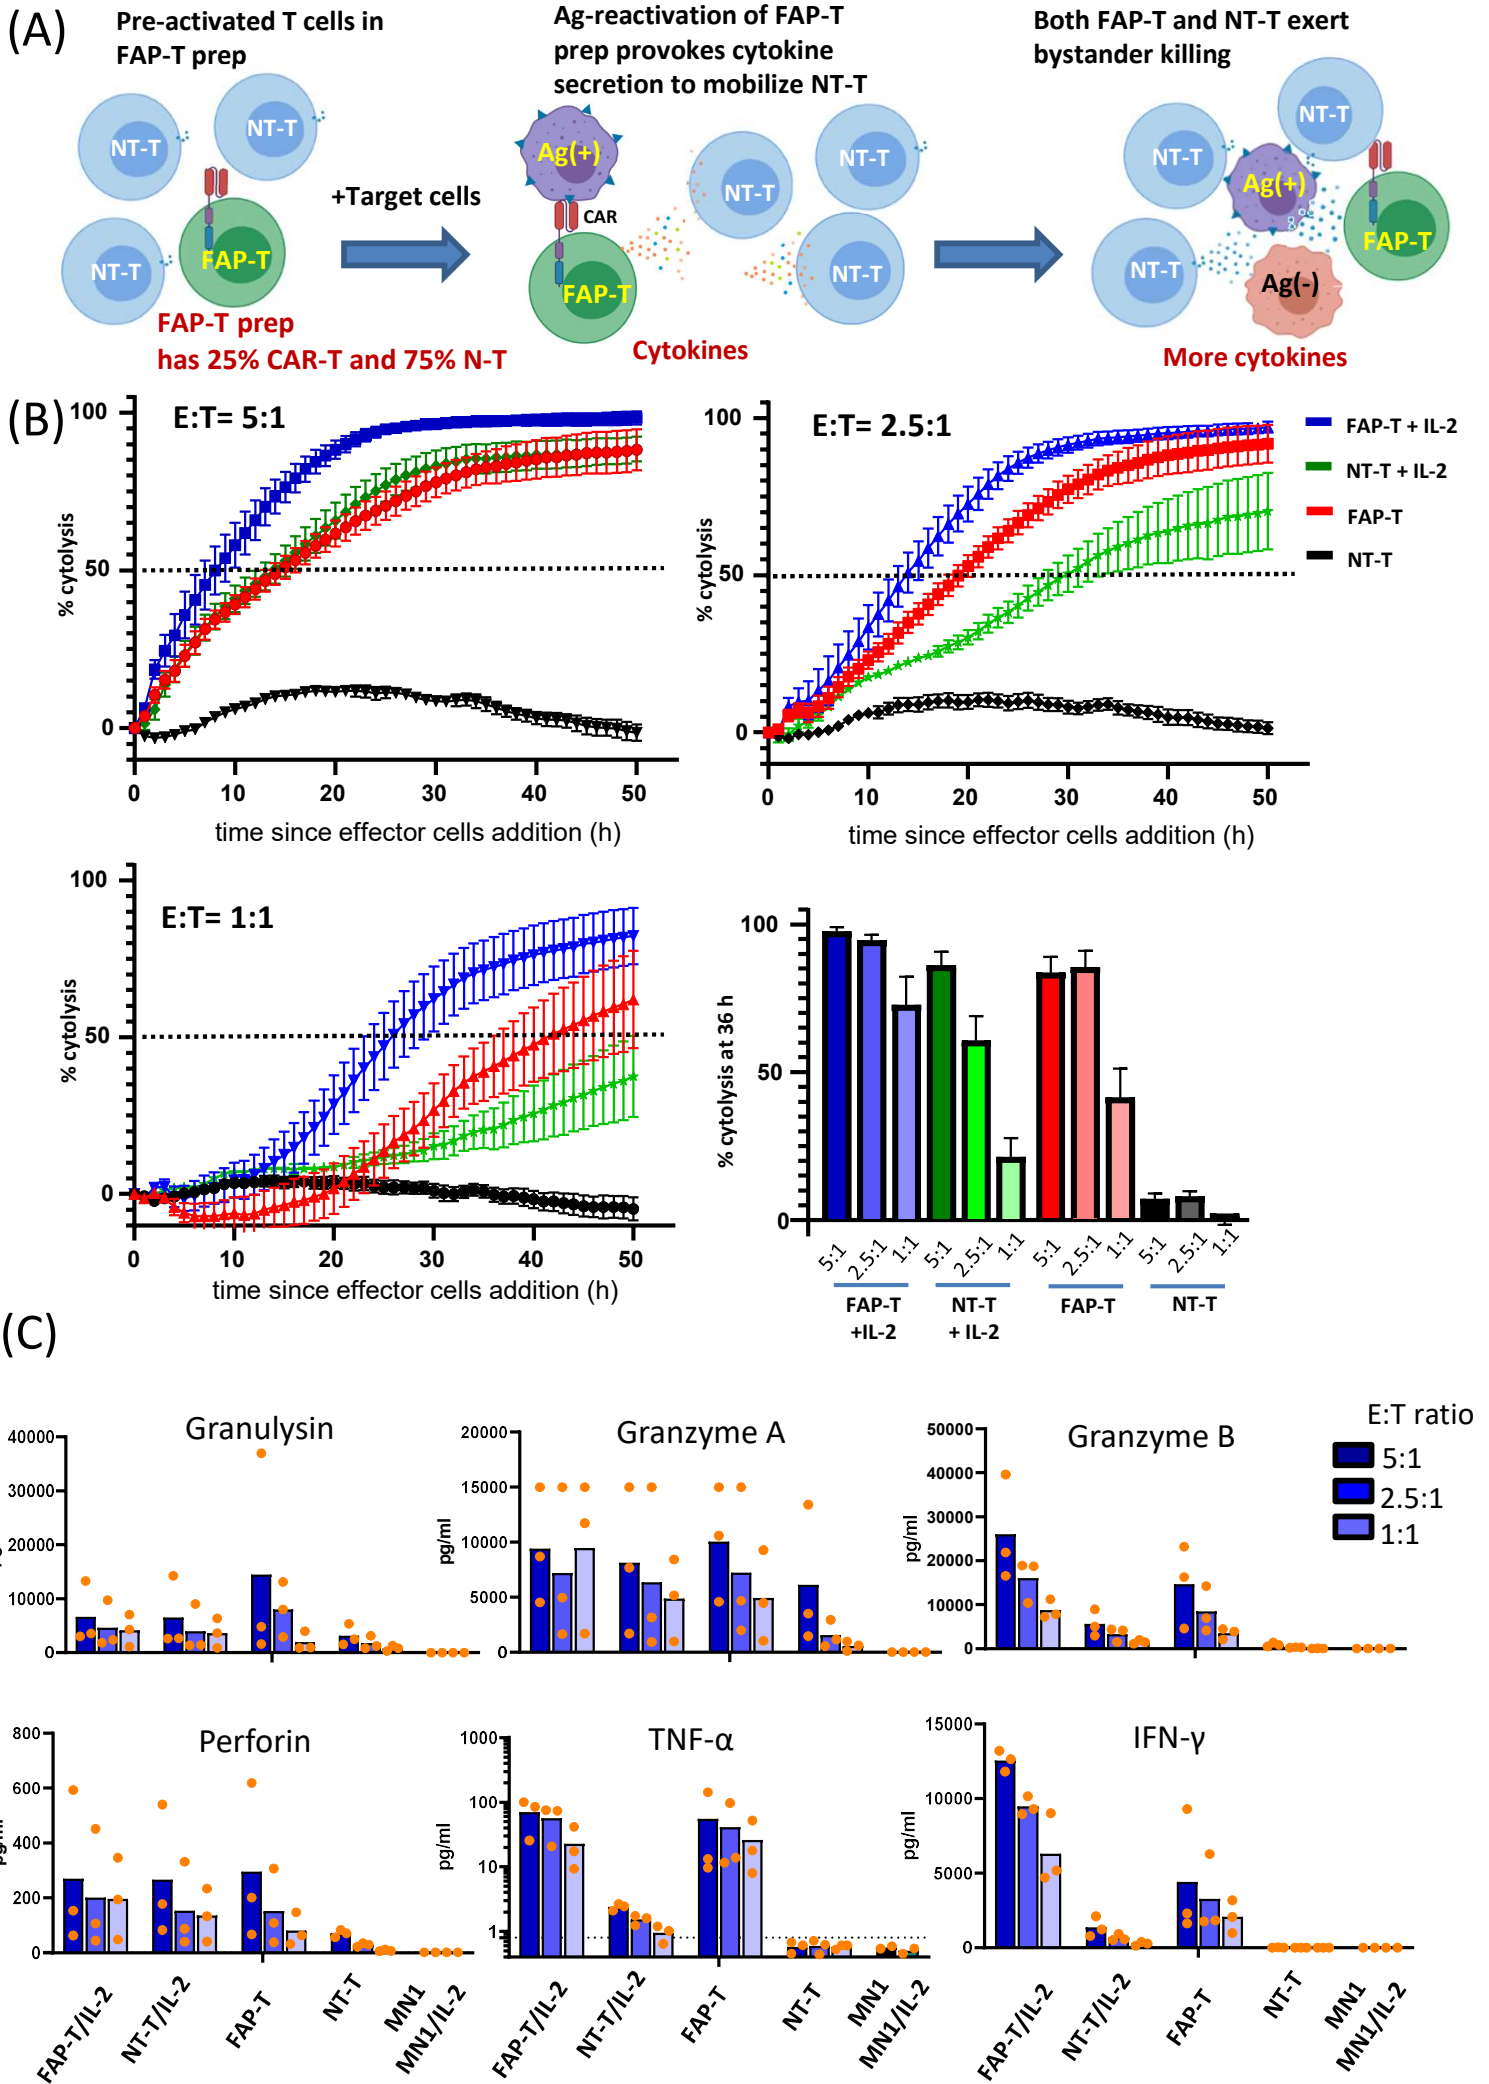



**Figure 5. IL-2 induces T cells to exert antigen nonspecific cytotoxicity against GNS cells.** **(A)** A conceptual diagram of the theory. After antigen-specific activation, FAP-T cells secrete IL-2 which mobilizes NT-T cells to exert further cytotoxicity against tumor cells. **(B)** Cytotoxicity assay of FAP-T or NT-T cells against MN1 GNS cells, with or without exogenous IL-2. FAP(+) MN1 cells were established in a CytoView-Z plate for 24 hours prior to addition of effector cells. Target cell growth was monitored by impedance values in real time by the Maestro Z system. Time-course graphs for varying E:T ratios, as indicated, show target lysis as % cytotoxicity. A summary of % cytolysis at 36 hours after effector cell addition is shown bottom right. Data points represent mean +/- SEM for 6 readings from 3 independent experiments. **(C)** Secreted factors were measured in supernatants 50 hours after addition of effector cells using Legendplex assay. A total of 13 analytes were measured in 3 experiments (or 2 experiments for MN-1 and MN-1/IL-2 controls). Results of 6 key cytotoxic factors are shown, with the other 7 being depicted in Figure S4.

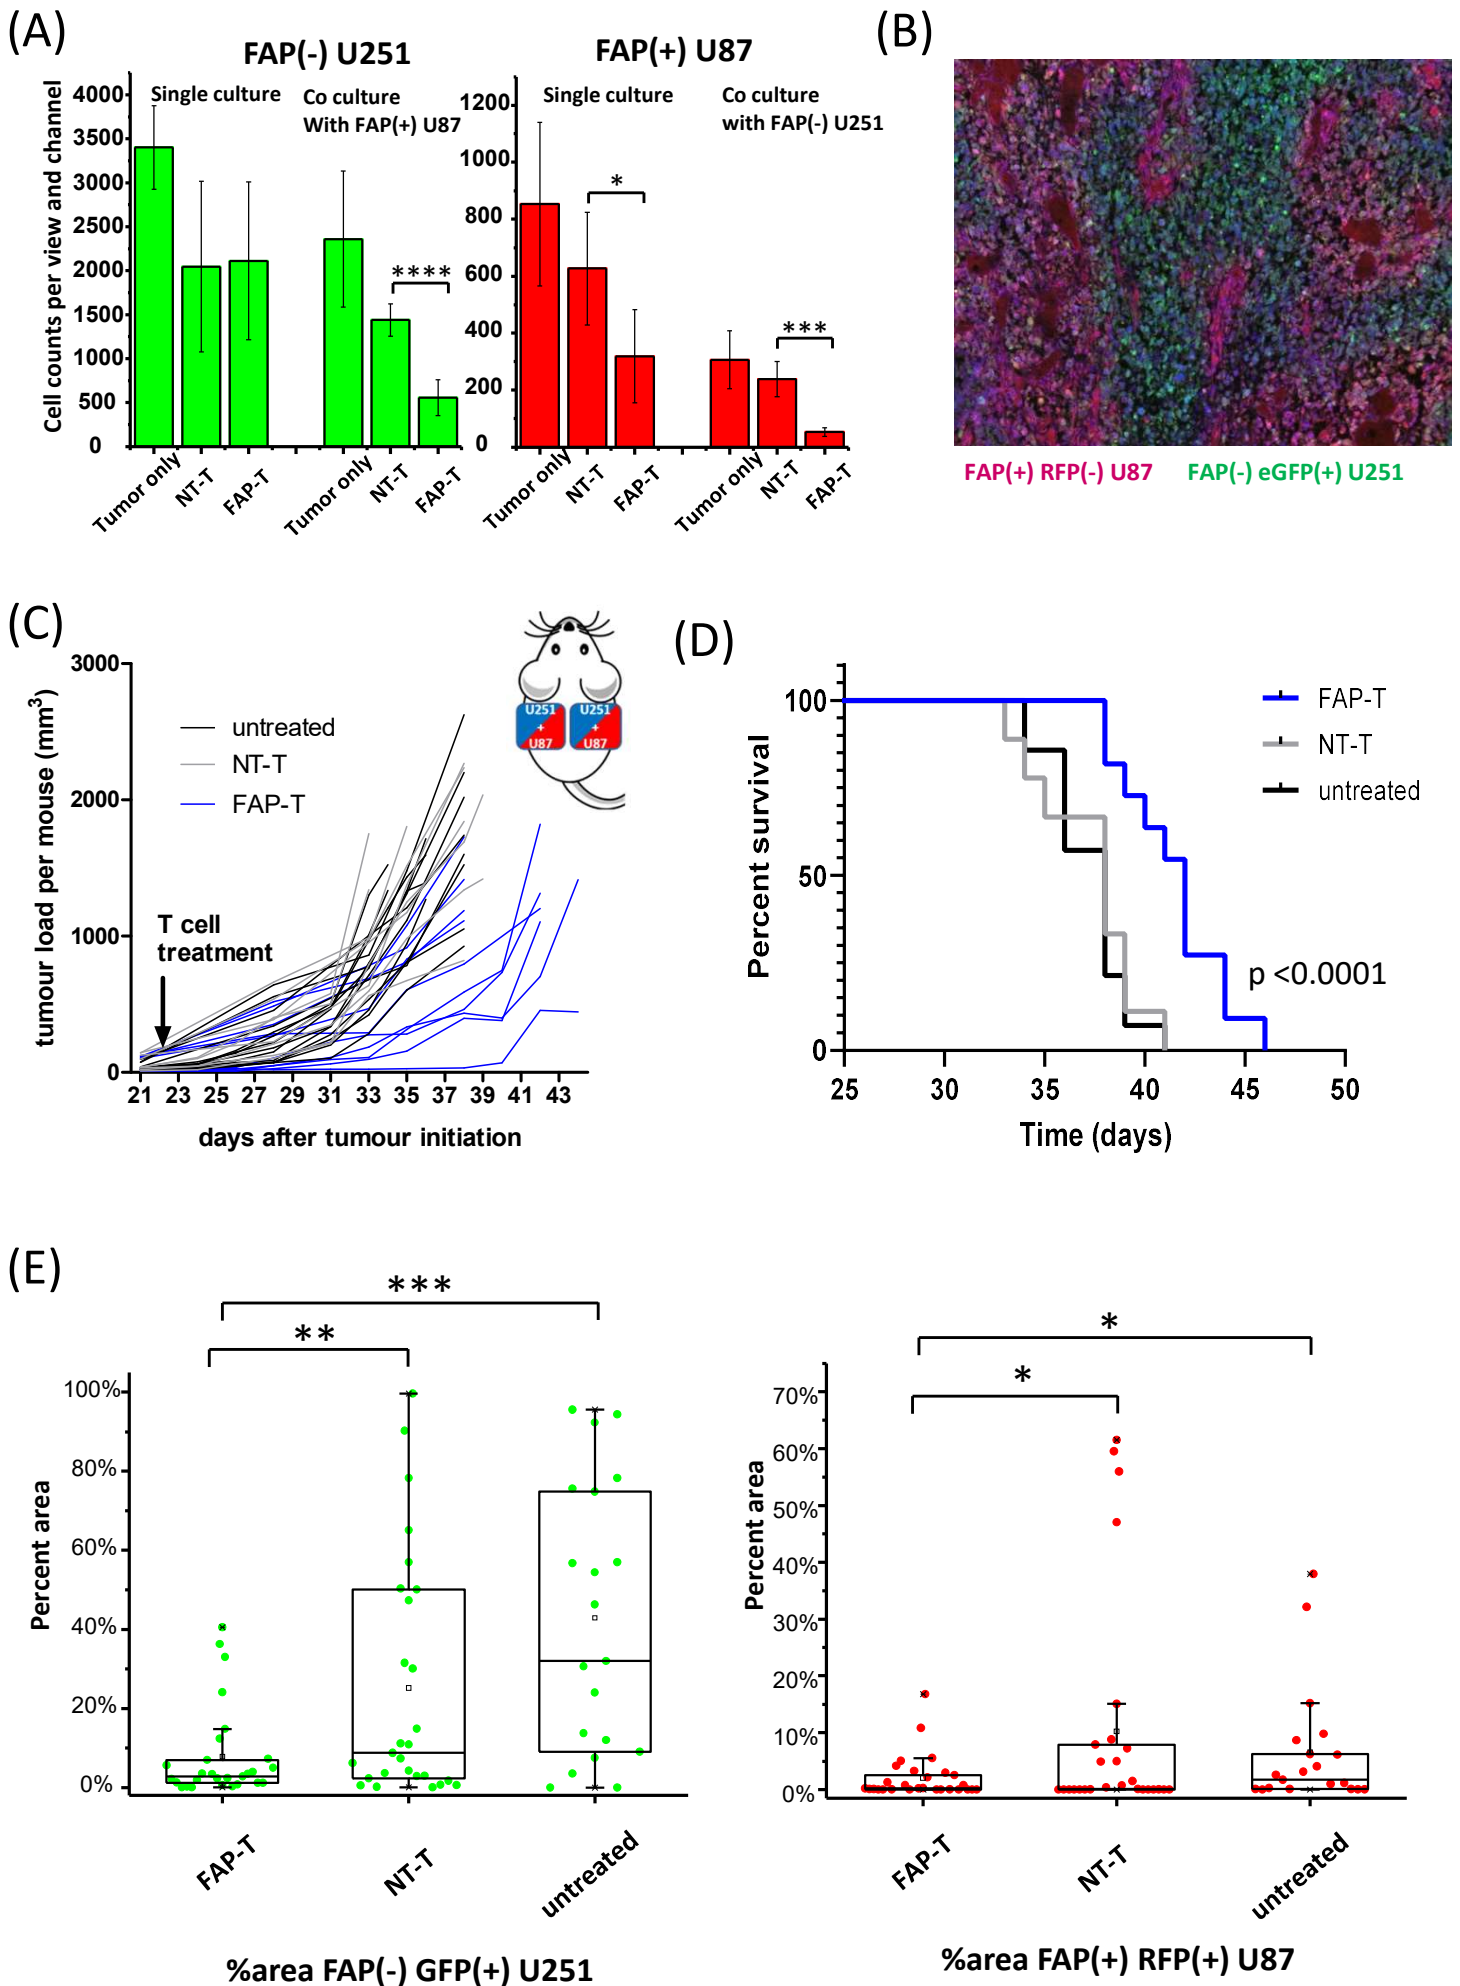

**Figure 6. FAP-T cells control tumor growth in a mouse model with heterogeneous antigen expression.** **(A)** In vitro bystander killing assay of FAP(-) U251-GFP and FAP(+) U87-RFP. Cells were cultured individually or together and were treated with FAP-T or NT-T cells. Fluorescent images were taken 24 hours later and GFP and RFP positive cells were counted using ImageJ. Data are from duplicate samples, with 3 fields of view imaged and counted per sample. Graphs show mean and SD from 6 counts. **(B-E)** Subcutaneous tumours were created on both flanks of NSG mice using a mixture of U251-GFP and U87-GFP cells (as illustrated in the inset to C). Tumors were allowed to establish for 21 days and then mice were treated with a single intravenous injection of  $1 \times 10^6$  FAP-T cells (blue) or NT-T cells (grey) or left untreated (black). FAP-T group n=11, NT-T group n=9, untreated group n=14. **(B)** Representative tumor tissue section showing the balance of U251 (green) and U87 (red) cells, with DAPI staining to visualize nuclei. **(C)** Tumor growth curves for each mouse. The volume of tumors on each flank was measured every 2-3 days and summed to calculate total tumor load per mouse. **(D)** Animals were humanely killed once at least one tumor reached 1000 mm<sup>3</sup> and survival analysis performed using a Kaplan–Meier plot. **(E)** GFP and RFP area of endpoint tumour sections were calculated. Data are pooled from a total of 28 sections from 13 tumours of FAP-T treated group, 27 sections from 13 tumors of NT-T treated group and 20 sections from 9 tumors of untreated group.

| Cytokines    | Correlation with cytotoxicity |                | IL-2/N-T vs N-T<br>(Significant or not) | IL-2/N-T vs IL-2/FAP-T<br>(Significant or not) |
|--------------|-------------------------------|----------------|-----------------------------------------|------------------------------------------------|
|              | Adj-R2                        | P value        |                                         |                                                |
| Granzyme B   | 0.47994                       | 8.66E-07       | Yes                                     | Yes                                            |
| IL-4         | 0.43468                       | 4.06E-06       | Yes                                     | Yes                                            |
| IFN $\gamma$ | 0.43145                       | 4.51E-06       | Yes                                     | Yes                                            |
| Perforin     | 0.29523                       | 2.52E-04       | Yes                                     | <b>No</b>                                      |
| Granzyme A   | 0.27994                       | 3.78E-04       | Yes                                     | Yes                                            |
| IL-6         | 0.26234                       | 5.99E-04       | Yes                                     | Yes                                            |
| TNF $\alpha$ | 0.25307                       | 7.60E-04       | Yes                                     | Yes                                            |
| IL-10        | 0.22098                       | 0.00171        | <b>No</b>                               | Yes                                            |
| IL-17a       | 0.20964                       | 0.00226        | <b>No</b>                               | Yes                                            |
| Granulysin   | 0.14905                       | 0.00962        | Yes                                     | Yes                                            |
| sFas         | -0.02626                      | <b>0.81865</b> | Yes                                     | Yes                                            |
| sFas L       | -0.02713                      | <b>0.88065</b> | Yes                                     | Yes                                            |

Table 1. Linear fitting regression was performed using cytotoxicity $_{36h}$  vs cytokine concentration $_{(pg/ml)}$ . The cytokines were ranked by their adjusted R<sup>2</sup> value from high to low in the table. P value was calculated by ANOVA. The significance of differences between NT-T +/-IL2 or between NT-T and FAP-T was determined by paired t test. P<0.05 was considered significant.
